# Supplementary material for: Views and experiences of seeking information and help for vitiligo: a qualitative study of written accounts
Source: PubMed Central journal article supplement — BMJ Open. 2018 Jan 11;8(1):e018652. doi: 10.1136/bmjopen-2017-018652 (PMC5781159; doi:10.1136/bmjopen-2017-018652), 2018-01-11
Supplement: bmjopen-2017-018652.draft_revisions.pdf [file bmjopen-2017-018652.draft_revisions.pdf]

# BMJ Open

BMJ Open is committed to open peer review. As part of this commitment we make the peer review history of every article we publish publicly available.

When an article is published we post the peer reviewers' comments and the authors' responses online. We also post the versions of the paper that were used during peer review. These are the versions that the peer review comments apply to.

The versions of the paper that follow are the versions that were submitted during the peer review process. They are not the versions of record or the final published versions. They should not be cited or distributed as the published version of this manuscript.

BMJ Open is an open access journal and the full, final, typeset and author-corrected version of record of the manuscript is available on our site with no access controls, subscription charges or pay-per-view fees (<http://bmjopen.bmj.com>).

If you have any questions on BMJ Open's open peer review process please email [editorial.bmjopen@bmj.com](mailto:editorial.bmjopen@bmj.com)

# BMJ Open

## Views and experiences of seeking information and help for vitiligo: a qualitative study of written accounts

|                                 |                                                                                                                                                                                                                                                                                                                                                                                                              |
|---------------------------------|--------------------------------------------------------------------------------------------------------------------------------------------------------------------------------------------------------------------------------------------------------------------------------------------------------------------------------------------------------------------------------------------------------------|
| Journal:                        | <i>BMJ Open</i>                                                                                                                                                                                                                                                                                                                                                                                              |
| Manuscript ID                   | bmjopen-2017-018652                                                                                                                                                                                                                                                                                                                                                                                          |
| Article Type:                   | Research                                                                                                                                                                                                                                                                                                                                                                                                     |
| Date Submitted by the Author:   | 13-Jul-2017                                                                                                                                                                                                                                                                                                                                                                                                  |
| Complete List of Authors:       | Teasdale, Emma; University of Southampton<br>Muller, Ingrid; University of Southampton, Department of Psychology<br>Abdullah Sani, A; University of Southampton , Faculty of Medicine<br>Thomas, Kim; University of Nottingham, Dermatology<br>Stuart, Beth; University of Southampton, Primary Care and Population Science<br>Santer, Miriam; University of Southampton, Primary Care & Population Sciences |
| <b>Primary Subject Heading</b>: | Dermatology                                                                                                                                                                                                                                                                                                                                                                                                  |
| Secondary Subject Heading:      | Qualitative research                                                                                                                                                                                                                                                                                                                                                                                         |
| Keywords:                       | Vitiligo, PRIMARY CARE, QUALITATIVE RESEARCH, patient experience, DERMATOLOGY                                                                                                                                                                                                                                                                                                                                |
|                                 |                                                                                                                                                                                                                                                                                                                                                                                                              |

SCHOLARONE™  
Manuscripts

1  
2  
3  
4  
5  
6  
7  
8 **Views and experiences of seeking information and help for vitiligo: a**  
9 **qualitative study of written accounts**

10  
11  
12 Running title: Experiences of seeking information and help for vitiligo

13  
14  
15  
16 **E Teasdale<sup>1\*</sup>, I Muller<sup>1,2</sup>, A Abdullah Sani<sup>1</sup>, KS Thomas<sup>3</sup>, B Stuart<sup>1</sup> and M Santer<sup>1</sup>**

17  
18 <sup>1</sup>Primary Care and Population Science, Faculty of Medicine, University of Southampton,  
19 Southampton, UK

20  
21 <sup>2</sup>Academic Unit of Psychology, Faculty of Social and Human Sciences, University of  
22 Southampton, Southampton, UK

23  
24 <sup>3</sup>Centre for Evidence Based Dermatology, University of Nottingham, Nottingham, UK

25  
26  
27  
28  
29 **\*Corresponding author:**

30  
31 Dr Emma Teasdale  
32 Research Fellow  
33 Faculty of Medicine  
34 University of Southampton  
35 Aldermoor Health Centre  
36 Aldermoor Close  
37 Southampton  
38 SO16 5ST  
39 Tel: 02380 591753

40  
41 [e.j.teasdale@soton.ac.uk](mailto:e.j.teasdale@soton.ac.uk)

42  
43  
44  
45  
46 **Word count = 3,380** (including quotes)

**ABSTRACT** (294 words)

**Objectives:** Vitiligo is a relatively common autoimmune condition causing loss of skin pigment. Around 1 in 100 people in the UK develop vitiligo. It can have a significant impact on quality of life for many of those affected. How people access information and help for vitiligo may influence how they manage such impact. We aimed to explore people's views and experiences of seeking health information and help for vitiligo.

**Design:** Qualitative analysis of free-text responses to four open-ended questions in an online survey.

**Setting:** Online survey conducted in the UK between February and March 2016

**Participants:** A survey link was emailed to 675 members of The Vitiligo Society, a UK-based charity providing information and support for people with vitiligo. One hundred and sixty one members responded to the survey (24%).

**Results:** Many participants wrote extensive free text, often reporting frustration with help-seeking. They perceived GPs as their primary source of advice but felt that GPs had low awareness of available treatments. Where GPs appeared sympathetic or signposted towards further information this was appreciated, even where people felt their GP had not seemed knowledgeable. Many felt that vitiligo was dismissed by health professionals including GPs and Dermatologists as 'cosmetic', which upset those who experienced substantial impact. Participants expressed concerns about the credibility of online information on vitiligo and the need for reliable, detailed information, as well as a desire for support with managing its psychosocial impact.

**Conclusions:** Information and help-seeking needs of people with vitiligo currently appear to be poorly met, even amongst members of the Vitiligo Society, who are likely to have received more information than others. People with vitiligo would welcome greater health professional awareness of available vitiligo treatments. Acknowledging the psychosocial impacts of vitiligo and signposting towards credible information are also welcomed.

**KEYWORDS**

Vitiligo; primary health care; qualitative; patient experience; information; dermatology

**STRENGTHS AND LIMITATIONS OF THIS STUDY**

- To our knowledge, this is the first qualitative study to explore the help-seeking behaviour of people with vitiligo.
- Our novel study provides valuable insights into the experiences of people with vitiligo in seeking information and treatment about their condition.
- We employed an efficient yet relatively under-utilised method of qualitative data collection to explore an under-researched topic area.
- Members of the Vitiligo Society may not be representative of all people with vitiligo and most of the participants in this study were over 45, which is likely to be unrepresentative of the whole population of people with vitiligo as the condition commonly appears before the age of 20.

## INTRODUCTION

Vitiligo is an autoimmune disease where pale white patches progressively develop on the skin due to loss of pigment. Worldwide prevalence ranges between 0.5 and 2% and around 1 in 100 people in the UK develop vitiligo.<sup>1,2</sup> The appearance altering nature of vitiligo can have a significant impact on quality of life, particularly in terms of increased anxiety, lowered self-esteem, relationship difficulties, and it may also negatively affect self-confidence and body image.<sup>3,4</sup> Most vitiligo develops before the age of 20 and may have a profound impact on confidence and self-image at a key time in social development.<sup>5</sup>

The only product currently licensed for use in the treatment of vitiligo is cosmetic camouflage, for which no randomised controlled trials are available. The evidence base for other treatments is also currently poor.<sup>6</sup> A European Guideline has suggested that early treatment of small lesions of recent onset and childhood vitiligo should be treated with a combination of phototherapy and topical agents, such as topical corticosteroids or topical calcineurin inhibitors.<sup>7</sup> Such treatments are unlikely to be used if people with vitiligo do not consult health professionals or do not receive appropriate advice from health professionals.

Previous research has highlighted the psychosocial impact of vitiligo and the coping strategies adopted by people living with vitiligo. A survey carried out amongst members of the Vitiligo Society in 2010 showed that over half (56.6%) of respondents felt that vitiligo moderately or severely affected their quality of life.<sup>8</sup> One qualitative interview study carried out with seven white British women, reported a continuous struggle using avoidance, concealment and cognitive strategies to try to deal with the impact of vitiligo.<sup>9</sup> Another qualitative interview study was conducted with seven British women of South Asian descent. All had experienced stigmatisation to some extent. Avoidance and concealment were commonplace, as was a profound impact on their relationships and sense of identity.<sup>10</sup>

How people access and make sense of information, and seek help for vitiligo, is likely to influence how they cope with the psychosocial impacts but there is relatively little research on people's experiences of obtaining information and treatment for vitiligo. Previous quantitative research suggests that people with vitiligo typically want to find a lasting effective treatment but they appear to have difficulty accessing treatment and feel that their condition is dismissed as 'trivial' or 'cosmetic'.<sup>8,11</sup> Members of the Vitiligo Society have reported<sup>11</sup> that they obtain information about vitiligo from non-medical sources, such as the Vitiligo Society (83%) and the internet (25%) rather than from dermatologists (13%) and GPs (7%).<sup>8</sup> Surprisingly few had obtained advice from GPs or

1  
2  
3 dermatologists. Further research is needed to explore whether this relates to difficulties in accessing  
4 advice or whether people actively choose to obtain advice elsewhere.  
5  
6

7 Qualitative methods are well suited to exploring a topic in-depth from the perspective of a particular  
8 group of people. Qualitative research that seeks to explore people's experiences of obtaining  
9 information about vitiligo and their help seeking behaviour could help to determine whether people  
10 with vitiligo expect GPs or Dermatologists to advise them about vitiligo or whether they generally  
11 seek information from charities or the internet instead of, or in addition to, consulting. This in turn  
12 would enable better understanding of how GPs and Dermatologists can best support people with  
13 vitiligo in terms of information provision and/ or signposting to reliable resources. Given the  
14 potential insights into people's experiences to be gained by using qualitative methods<sup>12</sup>, we  
15 incorporated open-ended questions into a quantitative survey about information and help-seeking  
16 behaviour in people with vitiligo. We aimed to explore views and experiences of seeking  
17 information and help for vitiligo through analysis of the written accounts of survey respondents.  
18  
19  
20  
21  
22  
23  
24  
25  
26  
27

## 28 **METHODS**

29  
30 This study sought to qualitatively analyse the free text comments within a quantitative survey that  
31 focused on exploring sources of information for vitiligo. This qualitative approach has been  
32 previously used in other health-related research.<sup>13-15</sup>  
33  
34  
35  
36  
37  
38

### 39 **Main survey**

40 An anonymous online survey of people with vitiligo was conducted in the UK in February 2016  
41 (response rate 161/675 (24%)). We sought participants through the Vitiligo Society, partly because  
42 this had been a successful route for previous research<sup>8</sup> but also because informal advice suggested  
43 vitiligo might not be well coded in primary care so recruiting through this route would be  
44 problematic. Details about the study and a link to the online survey were emailed to 675 members  
45 of the Vitiligo Society. A reminder email was sent out after 2 weeks. The survey link was also made  
46 available on the Vitiligo Society website from February to March 2016. In total, 161 people  
47 completed some or all of the survey questions and were included in the analysis. Participant  
48 characteristics are presented in Table 1. Quantitative survey findings regarding sources of  
49 information and help-seeking were similar to those previously reported.<sup>8</sup> This paper focusses on the  
50 rich qualitative data obtained from the free text responses to open-ended questions in the survey.  
51  
52  
53  
54  
55  
56  
57  
58  
59  
60

**Table 1: Survey Respondents' Characteristics**

|                                    | <b>Number of participants<br/>N=161</b> | <b>Percentage<br/>(%)</b> |
|------------------------------------|-----------------------------------------|---------------------------|
| Answered for themselves            | 151                                     | 93.8                      |
| Answered on behalf of other person | 4                                       | 2.5                       |
| Missing                            | 6                                       | 3.7                       |
| <b>Gender :</b>                    |                                         |                           |
| Male                               | 55                                      | 34.1                      |
| Female                             | 98                                      | 60.9                      |
| Missing                            | 8                                       | 5.0                       |
| <b>Age :</b>                       |                                         |                           |
| 5-16 years                         | 2                                       | 1.2                       |
| 16-25 years                        | 8                                       | 5.0                       |
| 26-45 years                        | 27                                      | 16.8                      |
| 46-65 years                        | 73                                      | 45.3                      |
| More than 65 years                 | 45                                      | 28.0                      |
| Missing                            | 6                                       | 3.7                       |
| <b>Portion of skin affected :</b>  |                                         |                           |
| Just a few patches (0-10%)         | 35                                      | 21.7                      |
| A fair amount (10-25%)             | 41                                      | 25.5                      |
| Quite a lot (25-50%)               | 33                                      | 20.5                      |
| Very much (50-80%)                 | 25                                      | 15.5                      |
| All or nearly all (more than 80%)  | 19                                      | 11.8                      |
| Missing                            | 8                                       | 5.0                       |
| <b>Skin Colour :</b>               |                                         |                           |
| Fair                               | 67                                      | 41.6                      |
| Medium                             | 75                                      | 46.6                      |
| Dark                               | 10                                      | 6.2                       |
| Very dark                          | 1                                       | 0.6                       |
| Missing                            | 8                                       | 5.0                       |
| <b>Family with vitiligo :</b>      |                                         |                           |
| Yes                                | 72                                      | 44.7                      |
| No                                 | 82                                      | 50.9                      |
| Missing                            | 7                                       | 4.4                       |
| <b>Living :</b>                    |                                         |                           |
| UK                                 | 147                                     | 91.3                      |
| Europe                             | 1                                       | 0.6                       |
| Elsewhere                          | 5                                       | 3.1                       |
| Missing                            | 8                                       | 5.0                       |



### Qualitative component

The online survey included four open-ended questions, which allowed participants to respond in more detail (Table 2). The survey dataset was imported into NVivo 10 and responses to the open-ended questions collated for analysis. A total of 495 responses to the open-ended questions (20,728 words) were received from 158 survey respondents (98%). Responses to the open-ended questions ranged from brief comments (one phrase or sentence) to more detailed accounts (a couple of paragraphs). Question 3 (informational needs of people with vitiligo) received the most responses and question 2 (experiences of seeking treatment for vitiligo) received the most detailed comments.

**Table 2: Open-ended questions in survey**

| Questions                                                                                                                                                                                | No. of responses to each question<br>% | Total no. of words per question |
|------------------------------------------------------------------------------------------------------------------------------------------------------------------------------------------|----------------------------------------|---------------------------------|
| <b>Q1.</b> We would be very interested to learn more about your experience of getting information for vitiligo. <i>If you are happy to, please can you tell us some more about this?</i> | <b>142</b><br>(90%)                    | 5,419                           |
| <b>Q2.</b> We would be very interested to learn more about your experience of getting treatment for vitiligo. <i>If you are happy to, please can you tell us some more about this?</i>   | <b>103</b><br>(65%)                    | 6,634                           |
| <b>Q3.</b> Are there any aspects of vitiligo that you feel you would like to know more about?                                                                                            | <b>148</b><br>(94%)                    | 3,682                           |
| <b>Q4.</b> Is there anything you would like to say that you feel has not been covered already?                                                                                           | <b>102</b><br>(65%)                    | 4,993                           |

### Data analysis

An inductive thematic analysis was conducted to explore people's experiences of seeking information and help for vitiligo.<sup>16</sup> One author (EJT) read the comments several times to achieve familiarisation with the data and codes were applied line by line. Codes were derived inductively from the data and grouped together to produce an initial coding frame. Codes were compared to identify similarities and differences. A detailed coding manual was created to ensure transparent and systematic coding of the data. Codes and theme/sub-theme definitions were discussed with,

1  
2  
3 and iteratively developed by, three members of the research team (EJT, MS and IM) to offer diverse  
4 inferences and interpretation of the data. A negative case analysis was carried out to ensure that all  
5 data was taken into account rather than just selecting data that fitted with the authors' viewpoint.  
6  
7 Data saturation could not be determined due to the nature of the method of data collection. Using  
8 NVivo enabled a detailed audit trail to be maintained. Ethical approval was granted by the Faculty of  
9  
10 Medicine Research Ethics Committee, University of Southampton.  
11  
12

## 13 14 15 16 RESULTS

17  
18 The majority of survey respondents (n=158, 98%) completed the open-ended questions, suggesting a  
19 high level of enthusiasm to provide written feedback on their experiences of seeking help and  
20 information for vitiligo. Analysis of these data highlighted 3 themes: 1) **experiences of consulting**  
21 **health professionals for vitiligo**, 2) **seeking information about vitiligo**, 3) **perceptions and**  
22 **experiences of vitiligo treatments**. These themes are explored in detail below. All quotes are  
23  
24 labelled with a participant ID, gender and age.  
25  
26  
27  
28  
29

### 30 31 Experiences of consulting health professionals for vitiligo

32  
33 A sense of dissatisfaction and feeling unsupported was apparent in participants' reports about their  
34 experiences of consulting health professionals for vitiligo. Participants often seemed disappointed  
35 by the response they had received from GPs, who were viewed as their primary source of contact  
36 and advice. A common perception amongst participants was that GPs are not generally aware of, or  
37 particularly knowledgeable about, vitiligo and as such can only provide limited information and  
38  
39 advice to patients.  
40  
41  
42

43 *"None of the GP's I have spoken to have ever offered advice about Vitiligo. They seem to be somewhat in the*  
44 *dark about the problem." (Pt36, male, over 65 years)*  
45

46  
47  
48 Where health professionals appeared sympathetic or where signposting towards further information  
49 was offered this was appreciated, even where people felt their GP had not been knowledgeable.  
50  
51

52 *"I have had vitiligo for about 35 years. I am now 70 years old. I have found that, with very few exceptions, GPs*  
53 *know little about the condition. One of my GPs (who "half-retired" a few years ago) was always interested in*  
54 *learning more and asked me if I could provide some information on vitiligo. I gave her some printed material*  
55 *and she was grateful; I know that she read everything which I provided." (Pt110, male, over 65 years)*  
56  
57  
58  
59  
60

1  
2  
3 Many participants felt they had just been left to 'get on with it' and learn to accept and manage their  
4 vitiligo on their own. For some participants this led them to seeking out alternative treatments not  
5 available in the UK. Another dominant perspective in this study was the sense that vitiligo is not  
6 taken seriously by medical professionals, both GPs and dermatologists. Many participants felt that  
7 their vitiligo was dismissed by health professionals as something inconsequential, i.e. purely  
8 cosmetic, which was upsetting to those experiencing substantial psychosocial impact.  
9

10  
11  
12  
13 *"I started my first signs of Vitiligo 30 years ago at the age of 40. I went to my GP who referred me to a  
14 consultant. The consultant proved to be absolutely useless in providing any information. He just took one look  
15 at me, told me it was something called Vitiligo and told me that it would most likely get worse but wouldn't kill  
16 me!!!" (Pt71, female, over 65 years)*  
17

18  
19 *"I noticed most doctors don't know much about vitiligo and really don't seem to care. I felt they had no clue  
20 about what a person with vitiligo goes through, Since it's not a matter of life or death, your expected to just  
21 accept it. I was very disappointed every time, always left feeling hopeless. I think they should have more to  
22 offer, be sympathetic & at least try different things" (Pt138, female, 46-65 years)*  
23

### 24 25 26 27 **Seeking information about vitiligo**

28  
29 Participants commonly reported seeking information from other sources, predominantly online  
30 resources, as a result of receiving limited information from health professionals. The Vitiligo Society  
31 was viewed as a helpful and trustworthy source of information for participants but many expressed  
32 doubts about the reliability and credibility of other online resources about vitiligo. A common  
33 concern expressed by the participants related to the credibility of online information on possible  
34 treatments for vitiligo. In particular, they expressed doubts about the commercial interests of the  
35 websites and about being able to determine the evidence base (safety and efficacy) of certain  
36 products and procedures.  
37

38  
39 *"I find it very difficult to find clear and consistent advice on possible treatments for Vitiligo. There are a lot of  
40 commercially orientated websites promoting a variety of herbal cures etc but limited proper evidence based  
41 medical guidance." (Pt40, male, 26-45 years)*  
42

43  
44 *"The only problem when searching for vitiligo sites is that some websites eventually lead into selling some sort  
45 of product which is the new "best treatment". You find that because you are motivated to find some sort of  
46 treatment you end up almost believing the hype that they sell." (Pt139, male, 46-65 years)*  
47

48  
49  
50  
51  
52  
53 A desire for detailed, reliable information about the causes of vitiligo, its progression and possible  
54 treatments was widely expressed. Some participants felt it important that such information should  
55 come directly from health professionals or other resources perceived to be trustworthy such as NHS  
56 Choices. Participants also expressed a desire for information and advice about managing the  
57  
58  
59  
60

1  
2  
3 psychosocial impact of living with vitiligo, particularly advice on learning to cope with social  
4 situations and people's reactions to their altered appearance, and how to explain the condition to  
5 others.  
6  
7

8  
9 *"I developed vitiligo 42 years ago when I was 2. The GP referred me to a very good dermatologist who*  
10 *explained things clearly as well as, crucially, how to sensibly explain it to other children." (Pt11, female 26-45*  
11 *years)*

12  
13 *"I would like more information on the cause of it and how to deal with being so self-conscious about it - it does*  
14 *affect confidence and forming relationships." (Pt130, female, 26-45 years)*  
15

### 16 17 18 **Perceptions and experiences of vitiligo treatments**

19  
20 Experiences of vitiligo treatments expressed by participants were very mixed. Whilst some  
21 participants expressed positive experiences of treatment, particularly UV light treatment, many  
22 participants appeared to have more negative experiences of seeking and receiving treatment for  
23 their vitiligo. A commonly expressed view was that vitiligo treatment is not routinely offered or is  
24 poorly available, especially on the NHS, and is limited to particular geographical locations.  
25  
26  
27

28  
29 *"We decided to have light treatment. My main concern was the Vitiligo on my face. The treatment worked well*  
30 *but a few years later it appeared elsewhere on my face so I had more treatment that also worked well. The*  
31 *spread of vitiligo has slowed to almost a stop apart from a couple of new areas on my face." (Pt74, male, 46-65*  
32 *years)*  
33

34  
35 *"There is very little treatment for Vitiligo in the UK. I am at present involved with the Hi-Light trial run by the*  
36 *Univ of Nottingham. This is the first time I have been able to obtain any treatment." (Pt102, male, over 65*  
37 *years)*  
38

39  
40 Many participants, who had received treatments such as steroid creams and light treatment for their  
41 vitiligo, felt they were ineffective in the long-term as the treatments had been unsuccessful in  
42 maintaining any areas of re-pigmentation. Participants also reported the perceived difficulties and  
43 potential side effects of vitiligo treatment such as concerns about skin thinning with steroid creams,  
44 time-consuming nature and inconvenience of hospital-based UV light treatment and the physical  
45 side effects of light treatment such as nausea and headaches.  
46  
47  
48  
49

50  
51 *"I was referred to Dermatology and was prescribed PUVA treatment. This helped for a while, but became so*  
52 *time consuming. Progress was very slow. I stopped the treatment and any areas of repigmentation soon*  
53 *reverted back to white skin. So disappointing." (Pt156, female, 46-65 years)*  
54  
55  
56  
57  
58  
59  
60

1  
2  
3 As well as mixed experiences of vitiligo treatments, there were mixed attitudes towards the need to  
4 seek vitiligo treatments in the first instance. Some participants reported less experience of  
5 treatments because they had not sought these out and had 'accepted' their vitiligo, even though it  
6 may have had a profound impact on their lives.  
7  
8

9  
10 *"I think that vitiligo is a relatively unknown condition. I have never been contacted about treatment or had it*  
11 *offered to me despite having had the condition for many years. You are very much left to get on with it. I can*  
12 *imagine that some people suffer psychologically and I wonder what support they get. I have come to terms*  
13 *with my patches and embrace them rather than disguise them but it can feel quite disheartening at times and I*  
14 *would rather not have them given the choice."* (Pt58, female, 46-65 years)  
15  
16

## 17 18 19 **DISCUSSION**

20  
21 To our knowledge, this is the first qualitative study of people's experiences seeking information and  
22 treatment for vitiligo. We found predominantly negative experiences of help-seeking, concerns  
23 about the credibility of online information, and the need for detailed, reliable vitiligo information.  
24 Frustration with challenges to help-seeking was often reported, particularly perceived lack of  
25 awareness of available treatments amongst GPs. Many felt that vitiligo was often dismissed by  
26 health professionals as 'cosmetic', which was upsetting to those experiencing substantial  
27 psychosocial impact. Where GPs appeared sympathetic or where signposting towards further  
28 information was offered this was appreciated, even where people felt their GP had not seemed  
29 knowledgeable. There were very mixed views about the need for treatment and a desire for support  
30 with managing the psychosocial impact of vitiligo.  
31  
32  
33  
34  
35  
36  
37  
38  
39

40 This novel study provides valuable insights into the experiences of people with vitiligo in seeking  
41 information and treatment about their condition. We employed an efficient yet relatively under-  
42 utilised method of qualitative data collection to explore an under-researched topic area. However,  
43 our findings need to be seen in the context of our sampling method. People with vitiligo who are  
44 members of the Vitiligo Society may not be representative of all people with vitiligo and the  
45 response rate for our survey, which was carried out entirely online, was lower than the previous  
46 survey amongst Vitiligo Society members<sup>8</sup>, which was carried out by post. This may mean that  
47 participants in this study had greater impact from vitiligo, or were more engaged with seeking  
48 treatment and information, than other people with vitiligo.  
49  
50  
51  
52  
53  
54

55 Most of the participants in this study were over 45, which is likely to be unrepresentative of the  
56 whole population of people with vitiligo as the condition commonly appears before the age of 20.<sup>17</sup>  
57  
58  
59  
60

1  
2  
3 <sup>18</sup> It is likely that most of the participants had had vitiligo for many years and their experience may  
4 differ from those more recently diagnosed. Furthermore, by sampling through a patient support  
5 group we may have been more likely to receive accounts from people whose needs had not been  
6 met by health services, although it is notable that this group still felt that they had many  
7 unanswered questions and that they found online information difficult to navigate.  
8  
9  
10

11  
12  
13  
14 The feeling that vitiligo is dismissed by health professionals as 'cosmetic' or 'trivial' shows that this is  
15 an ongoing concern for people, in common with previous reports,<sup>9,10</sup> and also in line with other skin  
16 conditions.<sup>19,20</sup> We found that people can find it difficult to judge the credibility of online information  
17 on vitiligo, as in other conditions<sup>21</sup>, but it seems surprising in this context where participants are all  
18 members of a relevant support group. It is noteworthy that participants still generally view health  
19 professionals as an important source of information, which has been noted in other studies<sup>22</sup> but  
20 again it seems surprising where participants are members of a support group and many reported  
21 negative experiences of consulting. Our finding that people are keen for support with managing the  
22 psychosocial impact of living with vitiligo was also found in a recent James Lind Alliance Priority  
23 Setting Partnership in the UK, which identified the need for further research into the effectiveness of  
24 psychological support for people with vitiligo, either on its own or together with other treatments.<sup>23</sup>  
25 The importance of providing people with skin diseases with access to a range of supportive services  
26 including psychological support was also acknowledged in a recent report of the All Party  
27 Parliamentary Group on Skin.<sup>24</sup> We feel that the varied views and experiences of vitiligo treatments  
28 are novel findings, which have implications for further research into how to support people with  
29 vitiligo.  
30  
31  
32  
33  
34  
35  
36  
37  
38  
39  
40  
41

42 Constraints on access to specialists through Primary Care 'gatekeeping' or 'managed care' may be  
43 associated with lower patient satisfaction<sup>25</sup> and respondents in this study expressed frustration  
44 with generalist services, perceiving them to have a low level of knowledge about their condition. It is  
45 not completely clear whether this represents lack of awareness amongst GPs of available treatments  
46 for vitiligo, or lack of provision of services into which they can refer. Access to vitiligo  
47 services/treatment is becoming increasingly difficult in many areas of the UK, which is likely to  
48 increase people's frustration with help-seeking and may exacerbate the psychosocial impact  
49 experienced by many people with vitiligo.  
50  
51  
52  
53  
54  
55  
56  
57  
58  
59  
60

This paper highlights opportunities for further research into the needs of people with vitiligo, particularly those with a recent diagnosis. There is also a paucity of comparative evidence for effective treatments for vitiligo. Greater evidence is also needed on how best to address the psychosocial impact of living with vitiligo. In an era where people are increasingly obtaining health information online<sup>26</sup>, it may be that education and psychological support interventions delivered online may benefit this population. Further research to develop and test web-based behavioural interventions that seek to support people living with vitiligo could also be valuable. Such interventions could include advice on managing social situations and explaining the condition to others, learning how to use camouflage, as well as clear and up-to-date information about the pros and cons of available treatments.

In conclusion, more can be done to meet the information and help-seeking needs of people with vitiligo. People with vitiligo would welcome greater health professional awareness of the possibility of treating vitiligo, yet recognise that generalist services may not always be able to offer this. People who had been directed towards reliable information were very grateful for this and signposting is viewed as a key role of GPs, which remain the primary source of information for many. Fortunately good online resources for people with vitiligo are available (Box 1). Signposting people with vitiligo towards credible online resources and acknowledging and exploring the potential impact of the condition may allay people's perceptions that distress caused by the condition is not taken seriously.

#### Box 1: Online resources for people with vitiligo

| Website              | URL                                                                                                                                                                                                                                                                                                                                       |
|----------------------|-------------------------------------------------------------------------------------------------------------------------------------------------------------------------------------------------------------------------------------------------------------------------------------------------------------------------------------------|
| NHS Choices          | <a href="http://www.nhs.uk/conditions/Vitiligo/Pages/Introduction.aspx">http://www.nhs.uk/conditions/Vitiligo/Pages/Introduction.aspx</a><br>Links to the official website of the National Health Service in England. Their section on vitiligo provides information and advice about vitiligo symptoms, causes diagnosis and treatments. |
| Patient.co.uk        | <a href="http://patient.info/health/vitiligo-leaflet">http://patient.info/health/vitiligo-leaflet</a><br>Links to a general medical information and support website providing information and advice about vitiligo symptoms, causes and treatments.                                                                                      |
| The Vitiligo Society | <a href="http://www.vitigosociety.org.uk/">http://www.vitigosociety.org.uk/</a><br>Links to The Vitiligo Society website, a UK-based charity providing information and support for people with vitiligo through their regularly update website and newsletter, <i>Dispatches</i> .                                                        |

**Funding Statement**

This research received no specific grant from any funding agency in the public, commercial or not-for-profit sectors.

**Competing interests**

The authors have no conflicts of interest to declare.

**Authors' contribution**

MS, IM and KT designed the study; AS collected the data under supervision of MS and BS; EJT, IM, BS and MS made substantial contributions to the analysis and interpretation of the data; EJT drafted the manuscript; IM, MS, BS, AS and KT critically reviewed and revised the manuscript; all authors gave the final approval of the version to be published.

**Data sharing statement**

This is a qualitative study and therefore the data generated is not suitable for sharing beyond that contained within the report. Further information can be obtained from the corresponding author.



## REFERENCES

1. NHS Choices. Vitiligo. [www.nhs.uk/Conditions/Vitiligo](http://www.nhs.uk/Conditions/Vitiligo). Accessed October 2016.
2. Kruger C, Panske A, Schallreuter KU. Disease-related behavioral patterns and experiences affect quality of life in children and adolescents with vitiligo. *Int J Dermatol* 2014;53(1):43-50.
3. Porter JR BA, Lerner A, Nordlund J. Psychosocial effect of vitiligo: a comparison of vitiligo patients with "normal" control subjects, with psoriasis patients, and with patients with other pigmentary disorders. *J Am Acad Dermatol* 1986;15:220-4.
4. Radtke MA, Schafer I, Gajur A, et al. Willingness-to-pay and quality of life in patients with vitiligo. *Br J Dermatol* 2009;161(1):134-9.
5. Silverberg JI, Silverberg NB. Quality of life impairment in children and adolescents with vitiligo. *Pediatr Dermatol* 2014;31(3):309-18.
6. Whitton ME PM, Batchelor J, Lushey C, Leonardi-Bee J, Gonzalez U. Interventions for vitiligo. *Cochrane Database Syst Rev* 2010;CD003263
7. Taieb A AA, Bohm M, et al. . Guidelines for the management of vitiligo: the European Dermatology Forum consensus. *Br J Dermatol* 2013;168:5-19.
8. Talsania N, Lamb B, Bewley A. Vitiligo is more than skin deep: a survey of members of the Vitiligo Society. *Clin Exp Dermatol* 2010;35(7):736-9.
9. Thompson AR, Kent G, Smith JA. Living with vitiligo: dealing with difference. *Br J Health Psychol* 2002;7(Pt 2):213-25.
10. Thompson AR, Clarke SA, Newell RJ, et al. Vitiligo linked to stigmatization in British South Asian women: a qualitative study of the experiences of living with vitiligo. *Br J Dermatol* 2010;163(3):481-6.
11. Ezzedine K, Sheth V, Rodrigues M, et al. Vitiligo is not a cosmetic disease. *J Am Acad Dermatol* 2015;73(5):883-5.
12. Nelson PA. Getting under the skin: qualitative methods in dermatology research. *British Journal of Dermatology* 2015;172(4):841-43.
13. Bishop FL HJ, Heneghan C, Stevens S, Richard Hobbs FDR, Lewith G. Placebo use in the UK: a qualitative study exploring GPs' views on placebo effects in clinical practice. *Family Practice* 2014;31(3):357-63.
14. Corner J WR, Glaser A, Richards, M. Qualitative analysis of patients' feedback from a PROMs survey of cancer patients in England. *BMJ Open* 2013;3:e002316.

- 1  
2  
3 15. Richards SH CJ, Walshaw E, et al. A multi-method analysis of free-text comments from the UK  
4 General Medical Council Colleague Questionnaires. *Med Edu* 2009;43:757-66.  
5  
6  
7 16. Joffe H YL. Content and thematic analysis. In: (ed) MD, ed. *Research Methods for Clinical and*  
8 *Health Psychology*. (Marks DK, Yardley L, eds) California: Sage, 2004; 56-68.  
9  
10 17. Naik A. Vitiligo : Compilation of clinico-epidemiological features in patients attending tertiary  
11 care government hospital, Thane. . *American Medical Journal* 2010;3(12):826-32.  
12  
13  
14 18. Reghu R JE. Epidemiological profile and treatment pattern of vitiligo in a tertiary care teaching  
15 hospital. . *Int J Pharm Sci* 2011;3(2):137-41.  
16  
17  
18 19. Magin PJ AJ, Heading GS, Pond CD. Patients with skin disease and their relationships with their  
19 doctors: a qualitative study of patients with acne, psoriasis and eczema. . *Medical Journal of*  
20 *Australia* 2009;190(2):62-4.  
21  
22 20. Nelson PA C-GC, Griffiths CE, Cordingley L, Team I. Recognition of need in health care  
23 consultations: a qualitative study of people with psoriasis. . *Br J Dermatol* 2013;168(2):354-61.  
24  
25  
26 21. Santer M MI, Yardley L, Burgess H, Ersser SJ, Lewis-Jones S, et al. 'You don't know which bits to  
27 believe': qualitative study exploring carers' experiences of seeking information on the internet about  
28 childhood eczema. . *BMJ Open* 2015;5(4):e006339.  
29  
30 22. Sillence E BP, Harris PR, Fishwick L. . How do patients evaluate and make use of online health  
31 information? . *Social science & medicine* 2007;64(9):1853-62.  
32  
33  
34 23. Eleftheriadou V, Whitton ME, Gawkrödger DJ, et al. Future research into the treatment of  
35 vitiligo: where should our priorities lie? Results of the vitiligo priority setting partnership. *Br J*  
36 *Dermatol* 2011;164(3):530-36.  
37  
38  
39 24. APPGS. The Psychological and Social Impact of Skin Diseases on People's Lives. A Report of the All  
40 Party Parliamentary Group on Skin Updated 2013 Edition. London, 2013.  
41  
42 25. Greenfield G FK, Majeed A. Rethinking primary care's gatekeeper role. *BMJ* 2016;354(i4803)  
43  
44  
45 26. Mazanderani F, Powell J. Using the internet as a source of information about patients'  
46 experiences. *Understanding and Using Health Experiences: Improving patient care*. Oxford: Oxford  
47 University Press, 2013; 94-103.  
48  
49  
50  
51  
52  
53  
54  
55  
56  
57  
58  
59  
60

# BMJ Open

## Views and experiences of seeking information and help for vitiligo: a qualitative study of written accounts

|                                 |                                                                                                                                                                                                                                                                                                                                                                                                                                                     |
|---------------------------------|-----------------------------------------------------------------------------------------------------------------------------------------------------------------------------------------------------------------------------------------------------------------------------------------------------------------------------------------------------------------------------------------------------------------------------------------------------|
| Journal:                        | <i>BMJ Open</i>                                                                                                                                                                                                                                                                                                                                                                                                                                     |
| Manuscript ID                   | bmjopen-2017-018652.R1                                                                                                                                                                                                                                                                                                                                                                                                                              |
| Article Type:                   | Research                                                                                                                                                                                                                                                                                                                                                                                                                                            |
| Date Submitted by the Author:   | 24-Nov-2017                                                                                                                                                                                                                                                                                                                                                                                                                                         |
| Complete List of Authors:       | Teasdale, Emma; University of Southampton , Primary Care and Population Sciences<br>Muller, Ingrid; University of Southampton, Department of Psychology<br>Abdullah Sani, A; University of Southampton , Faculty of Medicine<br>Thomas, Kim; University of Nottingham, Dermatology<br>Stuart, Beth; University of Southampton, Primary Care and Population Science<br>Santer, Miriam; University of Southampton, Primary Care & Population Sciences |
| <b>Primary Subject Heading</b>: | Dermatology                                                                                                                                                                                                                                                                                                                                                                                                                                         |
| Secondary Subject Heading:      | Qualitative research                                                                                                                                                                                                                                                                                                                                                                                                                                |
| Keywords:                       | Vitiligo, PRIMARY CARE, QUALITATIVE RESEARCH, patient experience, DERMATOLOGY                                                                                                                                                                                                                                                                                                                                                                       |
|                                 |                                                                                                                                                                                                                                                                                                                                                                                                                                                     |

SCHOLARONE™  
Manuscripts

only

1  
2  
3  
4  
5  
6  
7  
8 **Views and experiences of seeking information and help for vitiligo: a**  
9 **qualitative study of written accounts**  
10

11 Running title: Experiences of seeking information and help for vitiligo  
12  
13  
14

15 **E Teasdale<sup>1\*</sup>, I Muller<sup>1,2</sup>, A Abdullah Sani<sup>1</sup>, KS Thomas<sup>3</sup>, B Stuart<sup>1</sup> and M Santer<sup>1</sup>**  
16

17 <sup>1</sup>Primary Care and Population Science, Faculty of Medicine, University of Southampton,  
18 Southampton, UK  
19

20 <sup>2</sup>Academic Unit of Psychology, Faculty of Social and Human Sciences, University of  
21 Southampton, Southampton, UK  
22

23 <sup>3</sup>Centre for Evidence Based Dermatology, University of Nottingham, Nottingham, UK  
24  
25  
26  
27  
28

29 **\*Corresponding author:**  
30

31 Dr Emma Teasdale  
32 Research Fellow  
33 Faculty of Medicine  
34 University of Southampton  
35 Aldermoor Health Centre  
36 Aldermoor Close  
37 Southampton  
38 SO16 5ST  
39 Tel: 02380 591753  
40

41 [e.j.teasdale@soton.ac.uk](mailto:e.j.teasdale@soton.ac.uk)  
42  
43  
44

45 **Word count = 3,387** (including quotes)  
46  
47  
48  
49  
50  
51  
52  
53  
54  
55  
56  
57  
58  
59  
60

**ABSTRACT** (296 words)

**Objectives:** Vitiligo is a relatively common autoimmune condition causing loss of skin pigment. Around 1 in 100 people in the UK develop vitiligo. It can have a significant impact on quality of life for many of those affected. How people access information and help for vitiligo may influence how they manage such impact. We aimed to explore people's views and experiences of seeking health information and help for vitiligo.

**Design:** Qualitative analysis of free-text responses to four open-ended questions in an online survey.

**Setting:** Online survey conducted in the UK between February and March 2016

**Participants:** A survey link was emailed to 675 members of The Vitiligo Society, a UK-based charity providing information and support for people with vitiligo. One hundred and sixty one members responded to the survey (24%).

**Results:** Many participants wrote extensive free text, often reporting frustration with help-seeking. They perceived General Practitioners (GPs) as their primary source of advice but felt that GPs had low awareness of available treatments. Where GPs appeared sympathetic or signposted towards further information this was appreciated, even where people felt their GP had not seemed knowledgeable. Many felt that vitiligo was dismissed by health professionals including GPs and Dermatologists as 'cosmetic', which upset those who experienced substantial impact. Participants expressed concerns about the credibility of online information on vitiligo and the need for reliable, detailed information, as well as a desire for support with managing its psychosocial impact.

**Conclusions:** Information and help-seeking needs of people with vitiligo currently appear to be poorly met, even amongst members of the Vitiligo Society, who are likely to have received more information than others. People with vitiligo would welcome greater health professional awareness of available vitiligo treatments. Acknowledging the psychosocial impacts of vitiligo and signposting towards credible information are also welcomed.

**KEYWORDS**

Vitiligo; primary health care; qualitative; patient experience; information; dermatology

**STRENGTHS AND LIMITATIONS OF THIS STUDY**

- We employed an efficient yet relatively under-utilised method of qualitative data collection to explore an under-researched topic area.
- Conducting an exploratory qualitative analysis of the free text comments within a quantitative survey allowed us to gain novel and valuable insights into, and a greater understanding about, the experiences of people with vitiligo in seeking information and treatment about their condition.
- A limitation of this study was our sampling method. Members of the Vitiligo Society may not be representative of all people with vitiligo, which limits the transferability of our findings. Participants in this study could have had greater impact from vitiligo, been more unsatisfied with the information they had received, or more engaged with seeking treatment and information, than other people with vitiligo.
- Also most of the participants in this study were over 45, which is likely to be unrepresentative of the whole population of people with vitiligo as the condition commonly appears before the age of 20.

## INTRODUCTION

Vitiligo is an autoimmune disease where pale white patches progressively develop on the skin due to loss of pigment. Worldwide prevalence ranges between 0.5 and 2% and around 1 in 100 people in the UK develop vitiligo.<sup>1,2</sup> The appearance altering nature of vitiligo can have a significant impact on quality of life, particularly in terms of increased anxiety, lowered self-esteem, relationship difficulties, and it may also negatively affect self-confidence and body image.<sup>3,4</sup> Most vitiligo develops before the age of 20 and may have a profound impact on confidence and self-image at a key time in social development.<sup>5</sup>

The evidence base for vitiligo treatment is currently poor.<sup>6</sup> A European Guideline has suggested that early treatment of small lesions of recent onset and childhood vitiligo should be treated with a combination of phototherapy and topical agents, such as topical corticosteroids or topical calcineurin inhibitors.<sup>7</sup> Such treatments are less likely to be used if people with vitiligo do not consult health professionals or do not receive appropriate advice from health professionals.

Previous research has highlighted the psychosocial impact of vitiligo and the coping strategies adopted by people living with vitiligo. A survey carried out amongst members of the Vitiligo Society in 2010 showed that over half (56.6%) of respondents felt that vitiligo moderately or severely affected their quality of life.<sup>8</sup> One qualitative interview study carried out with seven white British women, reported a continuous struggle using avoidance, concealment and cognitive strategies to try to deal with the impact of vitiligo.<sup>9</sup> Another qualitative interview study was conducted with seven British women of South Asian descent. All had experienced stigmatisation to some extent. Avoidance and concealment were commonplace, as was a profound impact on their relationships and sense of identity.<sup>10</sup>

How people access and make sense of information, and seek help for vitiligo, is likely to influence how they cope with the psychosocial impacts but there is relatively little research on people's experiences of obtaining information and treatment for vitiligo. Previous quantitative research suggests that people with vitiligo typically want to find a lasting effective treatment but they appear to have difficulty accessing treatment and feel that their condition is dismissed as 'trivial' or 'cosmetic'.<sup>8,11</sup> Members of the Vitiligo Society have reported that they obtain information about vitiligo from non-medical sources, such as the Vitiligo Society (83%) and the internet (25%) rather than from dermatologists (13%) and General Practitioners (GPs) (7%).<sup>8</sup> Surprisingly few had obtained advice from GPs or dermatologists. Further research is needed to explore whether this relates to difficulties in accessing advice or whether people actively choose to obtain advice elsewhere.

1  
2  
3 Qualitative methods are well suited to exploring a topic in-depth from the perspective of a particular  
4 group of people. Qualitative research that seeks to explore people's experiences of obtaining  
5 information about vitiligo and their help seeking behaviour could help to determine whether people  
6 with vitiligo expect GPs or Dermatologists to advise them about vitiligo or whether they generally  
7 seek information from charities or the internet instead of, or in addition to, consulting. This in turn  
8 would enable better understanding of how GPs and Dermatologists can best support people with  
9 vitiligo in terms of information provision and/ or signposting to reliable resources. Given the  
10 potential insights into people's experiences to be gained by using qualitative methods<sup>12</sup>, we  
11 incorporated open-ended questions into a quantitative survey about information and help-seeking  
12 behaviour in people with vitiligo. We aimed to explore views and experiences of seeking  
13 information and help for vitiligo through analysis of the written accounts of survey respondents.  
14  
15  
16  
17  
18  
19  
20  
21  
22

## 23 **METHODS**

24  
25 This study sought to qualitatively analyse the free text comments within a quantitative survey that  
26 focused on exploring sources of information for vitiligo, experiences of treatment and information  
27 needs. This qualitative approach has been previously used in other health-related research.<sup>13-15</sup>  
28  
29

30 Ethical approval was granted by the Faculty of Medicine Research Ethics Committee, University of  
31 Southampton.  
32  
33

### 34 **Main survey**

35  
36 An anonymous online survey of people with vitiligo was conducted in the UK in February 2016  
37 (response rate 161/675 (24%)). We sought participants through the Vitiligo Society, partly because  
38 this had been a successful route for previous research<sup>8</sup> but also because informal advice suggested  
39 vitiligo might not be well coded in primary care so recruiting through this route would be  
40 problematic. Details about the study and a link to the online survey were emailed to 675 members  
41 of the Vitiligo Society. A reminder email was sent out after 2 weeks. The survey link was also made  
42 available on the Vitiligo Society website from February to March 2016. Participants provided online  
43 informed consent prior to accessing the survey. In total, 161 people completed some or all of the  
44 survey questions and were included in the analysis (Table 1). Quantitative survey findings regarding  
45 sources of information and help-seeking were similar to those previously reported.<sup>8</sup> This paper  
46 focusses on the rich qualitative data obtained from the free text responses to open-ended questions  
47 in the survey.  
48  
49  
50  
51  
52  
53  
54  
55  
56  
57  
58  
59  
60



**Table 1: Survey Respondents' Characteristics**

|                                    | <b>Number of participants<br/>N=161</b> | <b>Percentage<br/>(%)</b> |
|------------------------------------|-----------------------------------------|---------------------------|
| Answered for themselves            | 151                                     | 93.8                      |
| Answered on behalf of other person | 4                                       | 2.5                       |
| Missing                            | 6                                       | 3.7                       |
| <b>Gender :</b>                    |                                         |                           |
| Male                               | 55                                      | 34.1                      |
| Female                             | 98                                      | 60.9                      |
| Missing                            | 8                                       | 5.0                       |
| <b>Age :</b>                       |                                         |                           |
| 5-16 years                         | 2                                       | 1.2                       |
| 16-25 years                        | 8                                       | 5.0                       |
| 26-45 years                        | 27                                      | 16.8                      |
| 46-65 years                        | 73                                      | 45.3                      |
| More than 65 years                 | 45                                      | 28.0                      |
| Missing                            | 6                                       | 3.7                       |
| <b>Portion of skin affected :</b>  |                                         |                           |
| Just a few patches (0-10%)         | 35                                      | 21.7                      |
| A fair amount (10-25%)             | 41                                      | 25.5                      |
| Quite a lot (25-50%)               | 33                                      | 20.5                      |
| Very much (50-80%)                 | 25                                      | 15.5                      |
| All or nearly all (more than 80%)  | 19                                      | 11.8                      |
| Missing                            | 8                                       | 5.0                       |
| <b>Skin Colour :</b>               |                                         |                           |
| Fair                               | 67                                      | 41.6                      |
| Medium                             | 75                                      | 46.6                      |
| Dark                               | 10                                      | 6.2                       |
| Very dark                          | 1                                       | 0.6                       |
| Missing                            | 8                                       | 5.0                       |
| <b>Family with vitiligo :</b>      |                                         |                           |
| Yes                                | 72                                      | 44.7                      |
| No                                 | 82                                      | 50.9                      |
| Missing                            | 7                                       | 4.4                       |
| <b>Living :</b>                    |                                         |                           |
| UK                                 | 147                                     | 91.3                      |
| Europe                             | 1                                       | 0.6                       |
| Elsewhere                          | 5                                       | 3.1                       |
| Missing                            | 8                                       | 5.0                       |

**Qualitative component**

The online survey included four open-ended questions, which allowed participants to respond in more detail (Table 2). The survey dataset was imported into NVivo 10 and responses to the open-

ended questions collated for analysis. A total of 495 responses to the open-ended questions (20,728 words) were received from 158 of the 161 survey respondents (98% of respondents completed the free-text questions in addition the other survey questions). Responses to the open-ended questions ranged from brief comments (one phrase or sentence) to more detailed accounts (a couple of paragraphs). Question 3 (informational needs of people with vitiligo) received the most responses and question 2 (experiences of seeking treatment for vitiligo) received the most detailed comments.

**Table 2: Open-ended questions in survey**

| Questions                                                                                                                                                                                | No. of responses to each question | Total no. of words per question |
|------------------------------------------------------------------------------------------------------------------------------------------------------------------------------------------|-----------------------------------|---------------------------------|
|                                                                                                                                                                                          | %                                 |                                 |
| <b>Q1.</b> We would be very interested to learn more about your experience of getting information for vitiligo. <i>If you are happy to, please can you tell us some more about this?</i> | <b>142</b><br>(90%)               | 5,419                           |
| <b>Q2.</b> We would be very interested to learn more about your experience of getting treatment for vitiligo. <i>If you are happy to, please can you tell us some more about this?</i>   | <b>103</b><br>(65%)               | 6,634                           |
| <b>Q3.</b> Are there any aspects of vitiligo that you feel you would like to know more about?                                                                                            | <b>148</b><br>(94%)               | 3,682                           |
| <b>Q4.</b> Is there anything you would like to say that you feel has not been covered already?                                                                                           | <b>102</b><br>(65%)               | 4,993                           |

### Data analysis

An inductive thematic analysis was conducted to explore people's experiences of seeking information and help for vitiligo.<sup>16</sup> One author (EJT) read the comments several times to achieve familiarisation with the data and codes were applied line by line. Codes were derived inductively from the data and grouped together to produce an initial coding frame. Codes were compared to identify similarities and differences. A detailed coding manual was created to ensure transparent and systematic coding of the data. Codes and theme/sub-theme definitions were discussed with, and iteratively developed by, three members of the research team (EJT, MS and IM) to offer diverse

1  
2  
3 inferences and interpretation of the data. A negative case analysis was carried out to ensure that all  
4 data was taken into account rather than just selecting data that fitted with the authors' viewpoint.  
5  
6 Data saturation could not be determined due to the nature of the method of data collection. Using  
7  
8 NVivo enabled a detailed audit trail to be maintained.  
9

## 14 RESULTS

16 The majority of survey respondents (n=158, 98%) completed the open-ended questions, suggesting  
17 that those who responded to the survey were highly motivated to provide written feedback on their  
18 experiences of seeking help and information for vitiligo. Analysis of these data highlighted 3 themes:  
19  
20 1) **experiences of consulting health professionals for vitiligo**, 2) **seeking information about vitiligo**,  
21  
22 3) **perceptions and experiences of vitiligo treatments**. These themes are explored in detail below.  
23

24 All quotes are labelled with a participant ID, gender and age.  
25  
26  
27  
28

### 29 Experiences of consulting health professionals for vitiligo

30  
31 A sense of dissatisfaction and feeling unsupported was apparent in participants' reports about their  
32 experiences of consulting health professionals for vitiligo. Participants often seemed disappointed  
33 by the response they had received from GPs, who were viewed as their primary source of contact  
34 and advice. A common perception amongst participants was that GPs are not generally aware of, or  
35 particularly knowledgeable about, vitiligo and as such can only provide limited information and  
36  
37 advice to patients.  
38  
39

40  
41 *"None of the GP's I have spoken to have ever offered advice about Vitiligo. They seem to be somewhat in the*  
42 *dark about the problem."* (Pt36, male, over 65 years)  
43  
44

45  
46 Where health professionals appeared sympathetic or where signposting towards further information  
47 was offered this was appreciated, even where people felt their GP had not been knowledgeable.  
48  
49

50  
51 *"I have had vitiligo for about 35 years. I am now 70 years old. I have found that, with very few exceptions, GPs*  
52 *know little about the condition. One of my GPs (who "half-retired" a few years ago) was always interested in*  
53 *learning more and asked me if I could provide some information on vitiligo. I gave her some printed material*  
54 *and she was grateful; I know that she read everything which I provided."* (Pt110, male, over 65 years)  
55  
56  
57  
58  
59

1  
2  
3 Many participants felt they had just been left to 'get on with it' and learn to accept and manage their  
4 vitiligo on their own. For some participants this led them to seeking out alternative treatments not  
5 available in the UK. Another dominant perspective in this study was the sense that vitiligo is not  
6 taken seriously by medical professionals, both GPs and dermatologists. Many participants felt that  
7 their vitiligo was dismissed by health professionals as something inconsequential, i.e. purely  
8 cosmetic, which was upsetting to those experiencing substantial psychosocial impact.  
9  
10

11  
12  
13 *"I started my first signs of Vitiligo 30 years ago at the age of 40. I went to my GP who referred me to a*  
14 *consultant. The consultant proved to be absolutely useless in providing any information. He just took one look*  
15 *at me, told me it was something called Vitiligo and told me that it would most likely get worse but wouldn't kill*  
16 *me!!!" (Pt71, female, over 65 years)*  
17

18  
19 *"I noticed most doctors don't know much about vitiligo and really don't seem to care. I felt they had no clue*  
20 *about what a person with vitiligo goes through, Since it's not a matter of life or death, your expected to just*  
21 *accept it. I was very disappointed every time, always left feeling hopeless. I think they should have more to*  
22 *offer, be sympathetic & at least try different things" (Pt138, female, 46-65 years)*  
23

### 24 25 26 **Seeking information about vitiligo**

27  
28 Participants commonly reported seeking information from other sources, predominantly online  
29 resources, as a result of receiving limited information from health professionals. The Vitiligo Society  
30 was viewed as a helpful and trustworthy source of information for participants but many expressed  
31 doubts about the reliability and credibility of other online resources about vitiligo. A common  
32 concern expressed by the participants related to the credibility of online information on possible  
33 treatments for vitiligo. In particular, they expressed doubts about the commercial interests of the  
34 websites and about being able to determine the evidence base (safety and efficacy) of certain  
35 products and procedures.  
36  
37  
38  
39  
40

41  
42 *"I find it very difficult to find clear and consistent advice on possible treatments for Vitiligo. There are a lot of*  
43 *commercially orientated websites promoting a variety of herbal cures etc but limited proper evidence based*  
44 *medical guidance." (Pt40, male, 26-45 years)*  
45

46  
47 *"The only problem when searching for vitiligo sites is that some websites eventually lead into selling some sort*  
48 *of product which is the new "best treatment". You find that because you are motivated to find some sort of*  
49 *treatment you end up almost believing the hype that they sell." (Pt139, male, 46-65 years)*  
50

51  
52 A desire for detailed, reliable information about the causes of vitiligo, its progression and possible  
53 treatments was widely expressed. Some participants felt it important that such information should  
54 come directly from health professionals or other resources perceived to be trustworthy such as NHS  
55 Choices. Participants also expressed a desire for information and advice about managing the  
56  
57  
58  
59

1  
2  
3 psychosocial impact of living with vitiligo, particularly advice on learning to cope with social  
4 situations and people's reactions to their altered appearance, and how to explain the condition to  
5 others.  
6  
7

8 *"I developed vitiligo 42 years ago when I was 2. The GP referred me to a very good dermatologist who*  
9 *explained things clearly as well as, crucially, how to sensibly explain it to other children." (Pt11, female 26-45*  
10 *years)*  
11

12 *"I would like more information on the cause of it and how to deal with being so self-conscious about it - it does*  
13 *affect confidence and forming relationships." (Pt130, female, 26-45 years)*  
14  
15

### 16 17 **Perceptions and experiences of vitiligo treatments**

18  
19 Experiences of vitiligo treatments expressed by participants were very mixed. Whilst some  
20 participants expressed positive experiences of treatment, particularly UV light treatment, many  
21 participants appeared to have more negative experiences of seeking and receiving treatment for  
22 their vitiligo. A commonly expressed view was that vitiligo treatment is not routinely offered or is  
23 poorly available, especially on the NHS, and is limited to particular geographical locations.  
24  
25  
26  
27

28 *"We decided to have light treatment. My main concern was the Vitiligo on my face. The treatment worked well*  
29 *but a few years later it appeared elsewhere on my face so I had more treatment that also worked well. The*  
30 *spread of vitiligo has slowed to almost a stop apart from a couple of new areas on my face." (Pt74, male, 46-65*  
31 *years)*  
32

33 *"There is very little treatment for Vitiligo in the UK. I am at present involved with the Hi-Light trial run by the*  
34 *Univ of Nottingham. This is the first time I have been able to obtain any treatment." (Pt102, male, over 65*  
35 *years)*  
36  
37  
38  
39

40 Many participants, who had received treatments such as steroid creams and light treatment for their  
41 vitiligo, felt they were ineffective in the long-term as the treatments had been unsuccessful in  
42 maintaining any areas of re-pigmentation. Participants also reported the perceived difficulties and  
43 potential side effects of vitiligo treatment such as concerns about skin thinning with steroid creams,  
44 time-consuming nature and inconvenience of hospital-based UV light treatment and the physical  
45 side effects of light treatment such as nausea and headaches.  
46  
47  
48  
49

50 *"I was referred to Dermatology and was prescribed PUVA treatment. This helped for a while, but became so*  
51 *time consuming. Progress was very slow. I stopped the treatment and any areas of repigmentation soon*  
52 *reverted back to white skin. So disappointing." (Pt156, female, 46-65 years)*  
53  
54  
55  
56  
57  
58  
59  
60

1  
2  
3 As well as mixed experiences of vitiligo treatments, there were mixed attitudes towards the need to  
4 seek vitiligo treatments in the first instance. Some participants reported less experience of  
5 treatments because they had not sought these out and had 'accepted' their vitiligo, even though it  
6 may have had a profound impact on their lives.  
7  
8

9  
10 *"I think that vitiligo is a relatively unknown condition. I have never been contacted about treatment or had it*  
11 *offered to me despite having had the condition for many years. You are very much left to get on with it. I can*  
12 *imagine that some people suffer psychologically and I wonder what support they get. I have come to terms*  
13 *with my patches and embrace them rather than disguise them but it can feel quite disheartening at times and I*  
14 *would rather not have them given the choice."* (Pt58, female, 46-65 years)  
15

## 16 17 18 **DISCUSSION**

19  
20 We found predominantly negative experiences of help-seeking, concerns about the credibility of  
21 online information, and the need for detailed, reliable vitiligo information. Frustration with  
22 challenges to help-seeking was often reported, particularly perceived lack of awareness of available  
23 treatments amongst GPs. Many felt that vitiligo was often dismissed by health professionals as  
24 'cosmetic', which was upsetting to those experiencing substantial psychosocial impact. Where GPs  
25 appeared sympathetic or where signposting towards further information was offered this was  
26 appreciated, even where people felt their GP had not seemed knowledgeable. There were very  
27 mixed views about the need for treatment and a desire for support with managing the psychosocial  
28 impact of vitiligo.  
29  
30  
31  
32  
33  
34  
35

36  
37 This study provides valuable insights into the experiences of people with vitiligo in seeking  
38 information and treatment about their condition. We employed an efficient yet relatively under-  
39 utilised method of qualitative data collection to explore an under-researched topic area. Given the  
40 relative anonymity of providing written responses in an online survey, these data may have been  
41 more candid than data collected in face-to-face research settings. However, it was not possible in  
42 this context to ask participants to expand on or clarify their free-text responses. Being able to clarify  
43 and explore further vitiligo patients' views and experiences in a qualitative interview may have  
44 generated richer data that would have enabled a more in-depth qualitative analysis.  
45  
46  
47  
48  
49

50  
51 Our findings also need to be seen in the context of our sampling method. People with vitiligo who  
52 are members of the Vitiligo Society may not be representative of all people with vitiligo. Members  
53 of the Vitiligo Society pay an annual membership fee (£26), which may be a barrier to membership  
54 for some people. The response rate for our survey, which was carried out entirely online, was lower  
55  
56  
57

1  
2  
3 than the previous survey amongst Vitiligo Society members<sup>8</sup>, which was carried out by post. We did  
4 not compare responders to non-responders and so cannot be sure that our participants are different  
5 in some way to those who did not respond to the survey. This may mean that participants in this  
6 study had greater impact from vitiligo, were more unsatisfied with the information they had  
7 received, or were more engaged with seeking treatment and information, than other people with  
8 vitiligo and limits the transferability of the findings  
9  
10  
11

12  
13 Most of the participants in this study were over 45, which is likely to be unrepresentative of the  
14 whole population of people with vitiligo as the condition commonly appears before the age of 20.<sup>17</sup>  
15  
16<sup>18</sup> It is likely that most of the participants had had vitiligo for many years and their experience may  
17 differ from those more recently diagnosed. Furthermore, by sampling through a patient support  
18 group we may have been more likely to receive accounts from people whose needs had not been  
19 met by health services, although it is notable that this group still felt that they had many  
20 unanswered questions and that they found online information difficult to navigate.  
21  
22  
23  
24  
25  
26

27  
28 The feeling that vitiligo is dismissed by health professionals as 'cosmetic' or 'trivial' shows that this is  
29 an ongoing concern for people, in common with previous reports,<sup>9 10</sup> and also in line with other skin  
30 conditions.<sup>19 20</sup> We found that people can find it difficult to judge the credibility of online information  
31 on vitiligo, as in other conditions<sup>21</sup>, but it seems surprising in this context where participants are all  
32 members of a relevant support group. We also found that participants still generally view health  
33 professionals as an important source of information, which has been noted in other studies<sup>22</sup> Again it  
34 seems surprising that our participants, who were members of a support group and many of whom  
35 reported negative experiences of consulting, still wanted health professionals to be the main source  
36 of information. Our finding that people are keen for support with managing the psychosocial impact  
37 of living with vitiligo was also found in a recent James Lind Alliance Priority Setting Partnership in the  
38 UK, which identified the need for further research into the effectiveness of psychological support for  
39 people with vitiligo, either on its own or together with other treatments.<sup>23</sup> The importance of  
40 providing people with skin diseases with access to a range of supportive services including  
41 psychological support was also acknowledged in a recent report of the All Party Parliamentary Group  
42 on Skin.<sup>24</sup>  
43  
44  
45  
46  
47  
48  
49  
50  
51

52  
53 Constraints on access to specialists through Primary Care 'gatekeeping' or 'managed care' may be  
54 associated with lower patient satisfaction<sup>25</sup> and respondents in this study expressed frustration  
55 with generalist services, perceiving them to have a low level of knowledge about their condition. It is  
56  
57  
58  
59  
60

1  
2  
3 not completely clear whether this represents lack of awareness amongst GPs of available treatments  
4 for vitiligo, or lack of provision of services into which they can refer. Access to vitiligo  
5 services/treatment is becoming increasingly difficult in many areas of the UK, which is likely to  
6 increase people's frustration with help-seeking and may exacerbate the psychosocial impact  
7 experienced by many people with vitiligo.  
8  
9  
10

11  
12  
13  
14 This paper highlights opportunities for further qualitative and quantitative research exploring and  
15 examining the needs of people with vitiligo, particularly younger people with vitiligo and those with  
16 a recent diagnosis. There is also a paucity of comparative evidence for effective treatments for  
17 vitiligo. In addition to quantitative research examining the effectiveness of treatments, greater  
18 evidence is also needed on how best to address the psychosocial impact of living with vitiligo. In this  
19 study people's support needs included advice on managing social situations and explaining the  
20 condition to others, learning how to use camouflage, as well as clear and up-to-date information  
21 about the pros and cons of available treatments. Further research to develop and test education and  
22 psychological support interventions that seek to address the information and support needs of  
23 people with vitiligo are likely to be valuable. In an era where people are increasingly obtaining health  
24 information online<sup>26</sup>, it may be that education and psychological support interventions delivered  
25 online may be beneficial.  
26  
27  
28  
29  
30  
31  
32

33  
34 In conclusion, more can be done to meet the information and help-seeking needs of people with  
35 vitiligo. People with vitiligo would welcome greater health professional awareness of the possibility  
36 of treating vitiligo, yet recognise that generalist services may not always be able to offer this. People  
37 who had been directed towards reliable information were very grateful for this and signposting is  
38 viewed as a key role of GPs, which remain the primary source of information for many. Fortunately  
39 good online resources for people with vitiligo are available (Box 1). Signposting people with vitiligo  
40 towards credible online resources and acknowledging and exploring the potential impact of the  
41 condition may allay people's perceptions that distress caused by the condition is not taken seriously.  
42  
43  
44  
45  
46  
47  
48  
49  
50  
51  
52  
53  
54  
55  
56  
57  
58  
59  
60



**Box 1: Online resources for people with vitiligo**

| Website                     | URL                                                                                                                                                                                                                                                                                                                                           |
|-----------------------------|-----------------------------------------------------------------------------------------------------------------------------------------------------------------------------------------------------------------------------------------------------------------------------------------------------------------------------------------------|
| <b>NHS Choices</b>          | <a href="http://www.nhs.uk/conditions/Vitiligo/Pages/Introduction.aspx">http://www.nhs.uk/conditions/Vitiligo/Pages/Introduction.aspx</a><br><br>Links to the official website of the National Health Service in England. Their section on vitiligo provides information and advice about vitiligo symptoms, causes diagnosis and treatments. |
| <b>Patient.co.uk</b>        | <a href="http://patient.info/health/vitiligo-leaflet">http://patient.info/health/vitiligo-leaflet</a><br><br>Links to a general medical information and support website providing information and advice about vitiligo symptoms, causes and treatments.                                                                                      |
| <b>The Vitiligo Society</b> | <a href="http://www.vitiligosociety.org.uk/">http://www.vitiligosociety.org.uk/</a><br><br>Links to The Vitiligo Society website, a UK-based charity providing information and support for people with vitiligo through their regularly update website and newsletter, <i>Dispatches</i> .                                                    |

**Funding Statement**

This research received no specific grant from any funding agency in the public, commercial or not-for-profit sectors.

**Competing interests**

The authors have no conflicts of interest to declare.

**Authors' contribution**

MS, IM and KT designed the study; AAS collected the data under supervision of MS and BS; ET, IM, BS and MS made substantial contributions to the analysis and interpretation of the data; ET drafted the manuscript; IM, MS, BS, AAS and KT critically reviewed and revised the manuscript; all authors gave the final approval of the version to be published.

**Data sharing statement**

This is a qualitative study and therefore the data generated is not suitable for sharing beyond that contained within the report. Further information can be obtained from the corresponding author.

1  
2  
3 **REFERENCES**

- 4  
5 1. Osinubi O, Grainge MJ, Hong L, et al. The prevalence of psychological co-morbidity in people with  
6 vitiligo: a systematic review and meta-analysis. *Br J Dermatol* doi: 10.1111/bjd.16049  
7
- 8 2. Zhang Y, Cai Y, Shi M, et al. The Prevalence of Vitiligo: A Meta-Analysis. *PLOS ONE*  
9 2016;11(9):e0163806.  
10
- 11 3. Porter JR, Beuf A, Lerner A, Nordlund J. Psychosocial effect of vitiligo: a comparison of vitiligo  
12 patients with "normal" control subjects, with psoriasis patients, and with patients with other  
13 pigmentary disorders. *J Am Acad Dermatol* 1986;15:220-4.  
14
- 15 4. Radtke MA, Schafer I, Gajur A, et al. Willingness-to-pay and quality of life in patients with vitiligo.  
16 *Br J Dermatol* 2009;161(1):134-9.  
17
- 18 5. Silverberg JI, Silverberg NB. Quality of life impairment in children and adolescents with vitiligo.  
19 *Pediatr Dermatol* 2014;31(3):309-18.  
20
- 21 6. Whitton ME, Pinart M, Batchelor J, Lushey C, Leonardi-Bee J, Gonzalez U. Interventions for vitiligo.  
22 *Cochrane Database Syst Rev* 2010;CD003263  
23
- 24 7. Taieb A, Alomar A, Bohm M, et al. Guidelines for the management of vitiligo: the European  
25 Dermatology Forum consensus. *Br J Dermatol* 2013;168:5-19.  
26
- 27 8. Talsania N, Lamb B, Bewley A. Vitiligo is more than skin deep: a survey of members of the Vitiligo  
28 Society. *Clin Exp Dermatol* 2010;35(7):736-9.  
29
- 30 9. Thompson AR, Kent G, Smith JA. Living with vitiligo: dealing with difference. *Br J Health Psychol*  
31 2002;7(Pt 2):213-25.  
32
- 33 10. Thompson AR, Clarke SA, Newell RJ, et al. Vitiligo linked to stigmatization in British South Asian  
34 women: a qualitative study of the experiences of living with vitiligo. *Br J Dermatol* 2010;163(3):481-  
35 6.  
36
- 37 11. Ezzedine K, Sheth V, Rodrigues M, et al. Vitiligo is not a cosmetic disease. *J Am Acad Dermatol*  
38 2015;73(5):883-5.  
39
- 40 12. Nelson PA. Getting under the skin: qualitative methods in dermatology research. *British Journal*  
41 *of Dermatology* 2015;172(4):841-43.  
42
- 43 13. Bishop FL, Howick J, Heneghan C, Stevens S, Richard Hobbs FDR, Lewith G. Placebo use in the UK:  
44 a qualitative study exploring GPs' views on placebo effects in clinical practice. *Family Practice*  
45 2014;31(3):357-63.  
46
- 47 14. Corner J, Wagland R, Glaser A, Richards, M. Qualitative analysis of patients' feedback from a  
48 PROMs survey of cancer patients in England. *BMJ Open* 2013;3:e002316.  
49  
50  
51  
52  
53  
54  
55  
56  
57  
58  
59  
60

15. Richards SH, Campbell J, Walshaw E, et al. A multi-method analysis of free-text comments from the UK General Medical Council Colleague Questionnaires. *Med Edu* 2009;43:757-66.
16. Joffe H, Yardley L. Content and thematic analysis. In: (ed) MD, ed. *Research Methods for Clinical and Health Psychology*. London, UK: Sage, 2004:56-68.
17. Naik A. Vitiligo : Compilation of clinico-epidemiological features in patients attending tertiary care government hospital, Thane . *American Medical Journal* 2010;3(12):826-32.
18. Reghu R, James E. Epidemiological profile and treatment pattern of vitiligo in a tertiary care teaching hospital. *Int J Pharm Sci* 2011;3(2):137-41.
19. Magin PJ, Adams J, Heading GS, Pond CD. Patients with skin disease and their relationships with their doctors: a qualitative study of patients with acne, psoriasis and eczema . *Medical Journal of Australia* 2009;190(2):62-4.
20. Nelson PA, Graham- Chew C, Griffiths CE, Cordingley L, Team I. Recognition of need in health care consultations: a qualitative study of people with psoriasis. *Br J Dermatol* 2013;168(2):354-61.
21. Santer M, Muller I, Yardley L, Burgess H, Ersser SJ, Lewis-Jones S, et al. 'You don't know which bits to believe': qualitative study exploring carers' experiences of seeking information on the internet about childhood eczema. . *BMJ Open* 2015;5(4):e006339.
22. Sillence E, Briggs P, Harris PR, Fishwick L. . How do patients evaluate and make use of online health information? *Social science & medicine* 2007;64(9):1853-62.
23. Eleftheriadou V, Whitton ME, Gawkrödger DJ, et al. Future research into the treatment of vitiligo: where should our priorities lie? Results of the vitiligo priority setting partnership. *Br J Dermatol* 2011;164(3):530-36.
24. APPGS. *The Psychological and Social Impact of Skin Diseases on People's Lives. A Report of the All Party Parliamentary Group on Skin Updated 2013 Edition*. London, 2013.
25. Greenfield G, Foley K, Majeed A. Rethinking primary care's gatekeeper role. *BMJ* 2016;354(i4803)
26. Mazanderani F, Powell J. Using the internet as a source of information about patients' experiences. *Understanding and Using Health Experiences: Improving patient care* 2013:94-103

## Consolidated criteria for reporting qualitative studies (COREQ): 32-item checklist

Developed from:

Tong A, Sainsbury P, Craig J. Consolidated criteria for reporting qualitative research (COREQ): a 32-item checklist for interviews and focus groups. *International Journal for Quality in Health Care*. 2007. Volume 19, Number 6: pp. 349 – 357

| No. Item                                       | Guide questions/description                                                                                                                              | Reported on Page # |
|------------------------------------------------|----------------------------------------------------------------------------------------------------------------------------------------------------------|--------------------|
| <b>Domain 1: Research team and reflexivity</b> |                                                                                                                                                          |                    |
| <i>Personal Characteristics</i>                |                                                                                                                                                          |                    |
| 1. Inter viewer/facilitator                    | Which author/s conducted the inter view or focus group?                                                                                                  | N/A                |
| 2. Credentials                                 | What were the researcher's credentials? E.g. PhD, MD                                                                                                     | N/A                |
| 3. Occupation                                  | What was their occupation at the time of the study?                                                                                                      | N/A                |
| 4. Gender                                      | Was the researcher male or female?                                                                                                                       | N/A                |
| 5. Experience and training                     | What experience or training did the researcher have?                                                                                                     | N/A                |
| <i>Relationship with participants</i>          |                                                                                                                                                          |                    |
| 6. Relationship established                    | Was a relationship established prior to study commencement?                                                                                              | N/A                |
| 7. Participant knowledge of the interviewer    | What did the participants know about the researcher? e.g. personal goals, reasons for doing the research                                                 | N/A                |
| 8. Interviewer characteristics                 | What characteristics were reported about the inter viewer/facilitator? e.g. Bias, assumptions, reasons and interests in the research topic               | N/A                |
| <b>Domain 2: study design</b>                  |                                                                                                                                                          |                    |
| <i>Theoretical framework</i>                   |                                                                                                                                                          |                    |
| 9. Methodological orientation and Theory       | What methodological orientation was stated to underpin the study? e.g. grounded theory, discourse analysis, ethnography, phenomenology, content analysis | Methods, pg. 5     |
| <i>Participant selection</i>                   |                                                                                                                                                          |                    |
| 10. Sampling                                   | How were participants selected? e.g. purposive, convenience, consecutive, snowball                                                                       | Methods, pg. 5     |
| 11. Method of approach                         | How were participants approached? e.g. face-to-face, telephone, mail, email                                                                              | Methods, pg. 5     |
| 12. Sample size                                | How many participants were in the study?                                                                                                                 | Page 7             |
| 13. Non-participation                          | How many people refused to participate or dropped out? Reasons?                                                                                          | Pages 2 & 5        |
| <i>Setting</i>                                 |                                                                                                                                                          |                    |
| 14. Setting of data collection                 | Where was the data collected? e.g. home, clinic, workplace                                                                                               | Methods, page 5    |
| 15. Presence of non-participants               | Was anyone else present besides the participants and researchers?                                                                                        | N/A                |

|                                        |                                                                                                                                 |            |
|----------------------------------------|---------------------------------------------------------------------------------------------------------------------------------|------------|
| 16. Description of sample              | What are the important characteristics of the sample? e.g. demographic data, date                                               | Page 6     |
| <i>Data collection</i>                 |                                                                                                                                 |            |
| 17. Interview guide                    | Were questions, prompts, guides provided by the authors? Was it pilot tested?                                                   | N/A        |
| 18. Repeat interviews                  | Were repeat inter views carried out? If yes, how many?                                                                          | N/A        |
| 19. Audio/visual recording             | Did the research use audio or visual recording to collect the data?                                                             | N/A        |
| 20. Field notes                        | Were field notes made during and/or after the inter view or focus group?                                                        | N/A        |
| 21. Duration                           | What was the duration of the inter views or focus group?                                                                        | N/A        |
| 22. Data saturation                    | Was data saturation discussed?                                                                                                  | N/A        |
| 23. Transcripts returned               | Were transcripts returned to participants for comment and/or correction?                                                        | N/A        |
| <b>Domain 3: analysis and findings</b> |                                                                                                                                 |            |
| <i>Data analysis</i>                   |                                                                                                                                 |            |
| 24. Number of data coders              | How many data coders coded the data?                                                                                            | Page 7     |
| 25. Description of the coding tree     | Did authors provide a description of the coding tree?                                                                           | Page 7     |
| 26. Derivation of themes               | Were themes identified in advance or derived from the data?                                                                     | Page 7&8   |
| 27. Software                           | What software, if applicable, was used to manage the data?                                                                      | Page 8     |
| 28. Participant checking               | Did participants provide feedback on the findings?                                                                              | N/A        |
| <i>Reporting</i>                       |                                                                                                                                 |            |
| 29. Quotations presented               | Were participant quotations presented to illustrate the themes/findings? Was each quotation identified? e.g. participant number | Pages 8-11 |
| 30. Data and findings consistent       | Was there consistency between the data presented and the findings?                                                              | Pages 8-11 |
| 31. Clarity of major themes            | Were major themes clearly presented in the findings?                                                                            | Pages 8-11 |
| 32. Clarity of minor themes            | Is there a description of diverse cases or discussion of minor themes?                                                          | Page 10    |

# BMJ Open

## Views and experiences of seeking information and help for vitiligo: a qualitative study of written accounts

|                                 |                                                                                                                                                                                                                                                                                                                                                                                                                                                     |
|---------------------------------|-----------------------------------------------------------------------------------------------------------------------------------------------------------------------------------------------------------------------------------------------------------------------------------------------------------------------------------------------------------------------------------------------------------------------------------------------------|
| Journal:                        | <i>BMJ Open</i>                                                                                                                                                                                                                                                                                                                                                                                                                                     |
| Manuscript ID                   | bmjopen-2017-018652.R2                                                                                                                                                                                                                                                                                                                                                                                                                              |
| Article Type:                   | Research                                                                                                                                                                                                                                                                                                                                                                                                                                            |
| Date Submitted by the Author:   | 06-Dec-2017                                                                                                                                                                                                                                                                                                                                                                                                                                         |
| Complete List of Authors:       | Teasdale, Emma; University of Southampton , Primary Care and Population Sciences<br>Muller, Ingrid; University of Southampton, Department of Psychology<br>Abdullah Sani, A; University of Southampton , Faculty of Medicine<br>Thomas, Kim; University of Nottingham, Dermatology<br>Stuart, Beth; University of Southampton, Primary Care and Population Science<br>Santer, Miriam; University of Southampton, Primary Care & Population Sciences |
| <b>Primary Subject Heading</b>: | Dermatology                                                                                                                                                                                                                                                                                                                                                                                                                                         |
| Secondary Subject Heading:      | Qualitative research                                                                                                                                                                                                                                                                                                                                                                                                                                |
| Keywords:                       | Vitiligo, PRIMARY CARE, QUALITATIVE RESEARCH, patient experience, DERMATOLOGY                                                                                                                                                                                                                                                                                                                                                                       |
|                                 |                                                                                                                                                                                                                                                                                                                                                                                                                                                     |

SCHOLARONE™  
Manuscripts

only

1  
2  
3  
4  
5  
6  
7  
8 **Views and experiences of seeking information and help for vitiligo: a**  
9 **qualitative study of written accounts**  
10

11 Running title: Experiences of seeking information and help for vitiligo  
12  
13  
14

15 **E Teasdale<sup>1\*</sup>, I Muller<sup>1,2</sup>, A Abdullah Sani<sup>1</sup>, KS Thomas<sup>3</sup>, B Stuart<sup>1</sup> and M Santer<sup>1</sup>**  
16

17 <sup>1</sup>Primary Care and Population Science, Faculty of Medicine, University of Southampton,  
18 Southampton, UK  
19

20 <sup>2</sup>Academic Unit of Psychology, Faculty of Social and Human Sciences, University of  
21 Southampton, Southampton, UK  
22  
23

24 <sup>3</sup>Centre for Evidence Based Dermatology, University of Nottingham, Nottingham, UK  
25  
26  
27

28 **\*Corresponding author:**  
29

30 Dr Emma Teasdale  
31 Research Fellow  
32 Faculty of Medicine  
33 University of Southampton  
34 Aldermoor Health Centre  
35 Aldermoor Close  
36 Southampton  
37 SO16 5ST  
38 Tel: 02380 591753  
39  
40

41 [e.j.teasdale@soton.ac.uk](mailto:e.j.teasdale@soton.ac.uk)  
42  
43  
44

45 **Word count = 3,387** (including quotes)  
46  
47  
48  
49  
50  
51  
52  
53  
54  
55  
56  
57  
58  
59  
60



**ABSTRACT** (296 words)

**Objectives:** Vitiligo is a relatively common autoimmune condition causing loss of skin pigment. Around 1 in 100 people in the UK develop vitiligo. It can have a significant impact on quality of life for many of those affected. How people access information and help for vitiligo may influence how they manage such impact. We aimed to explore people's views and experiences of seeking health information and help for vitiligo.

**Design:** Qualitative analysis of free-text responses to four open-ended questions in an online survey.

**Setting:** Online survey conducted in the UK between February and March 2016

**Participants:** A survey link was emailed to 675 members of The Vitiligo Society, a UK-based charity providing information and support for people with vitiligo. One hundred and sixty one members responded to the survey (24%).

**Results:** Many participants wrote extensive free text, often reporting frustration with help-seeking. They perceived General Practitioners (GPs) as their primary source of advice but felt that GPs had low awareness of available treatments. Where GPs appeared sympathetic or signposted towards further information this was appreciated, even where people felt their GP had not seemed knowledgeable. Many felt that vitiligo was dismissed by health professionals including GPs and Dermatologists as 'cosmetic', which upset those who experienced substantial impact. Participants expressed concerns about the credibility of online information on vitiligo and the need for reliable, detailed information, as well as a desire for support with managing its psychosocial impact.

**Conclusions:** Information and help-seeking needs of people with vitiligo currently appear to be poorly met, even amongst members of the Vitiligo Society, who are likely to have received more information than others. People with vitiligo would welcome greater health professional awareness of available vitiligo treatments. Acknowledging the psychosocial impacts of vitiligo and signposting towards credible information are also welcomed.

**KEYWORDS**

Vitiligo; primary health care; qualitative; patient experience; information; dermatology

**STRENGTHS AND LIMITATIONS OF THIS STUDY**

- We employed an efficient yet relatively under-utilised method of qualitative data collection to explore an under-researched topic area.
- Conducting an exploratory qualitative analysis of the free text comments within a quantitative survey allowed us to gain novel and valuable insights into, and a greater understanding about, the experiences of people with vitiligo in seeking information and treatment about their condition.
- A limitation of this study was our sampling method. Members of the Vitiligo Society may not be representative of all people with vitiligo, which limits the transferability of our findings. Participants in this study could have had greater impact from vitiligo, been more unsatisfied with the information they had received, or more engaged with seeking treatment and information, than other people with vitiligo.
- Also most of the participants in this study were over 45, which is likely to be unrepresentative of the whole population of people with vitiligo as the condition commonly appears before the age of 20.

## INTRODUCTION

Vitiligo is an autoimmune disease where pale white patches progressively develop on the skin due to loss of pigment. Worldwide prevalence ranges between 0.5 and 2% and around 1 in 100 people in the UK develop vitiligo.<sup>1,2</sup> The appearance altering nature of vitiligo can have a significant impact on quality of life, particularly in terms of increased anxiety, lowered self-esteem, relationship difficulties, and it may also negatively affect self-confidence and body image.<sup>3,4</sup> Most vitiligo develops before the age of 20 and may have a profound impact on confidence and self-image at a key time in social development.<sup>5</sup>

The evidence base for vitiligo treatment is currently poor.<sup>6</sup> A European Guideline has suggested that early treatment of small lesions of recent onset and childhood vitiligo should be treated with a combination of phototherapy and topical agents, such as topical corticosteroids or topical calcineurin inhibitors.<sup>7</sup> Such treatments are less likely to be used if people with vitiligo do not consult health professionals or do not receive appropriate advice from health professionals.

Previous research has highlighted the psychosocial impact of vitiligo and the coping strategies adopted by people living with vitiligo. A survey carried out amongst members of the Vitiligo Society in 2010 showed that over half (56.6%) of respondents felt that vitiligo moderately or severely affected their quality of life.<sup>8</sup> One qualitative interview study carried out with seven white British women, reported a continuous struggle using avoidance, concealment and cognitive strategies to try to deal with the impact of vitiligo.<sup>9</sup> Another qualitative interview study was conducted with seven British women of South Asian descent. All had experienced stigmatisation to some extent. Avoidance and concealment were commonplace, as was a profound impact on their relationships and sense of identity.<sup>10</sup>

How people access and make sense of information, and seek help for vitiligo, is likely to influence how they cope with the psychosocial impacts but there is relatively little research on people's experiences of obtaining information and treatment for vitiligo. Previous quantitative research suggests that people with vitiligo typically want to find a lasting effective treatment but they appear to have difficulty accessing treatment and feel that their condition is dismissed as 'trivial' or 'cosmetic'.<sup>8,11</sup> Members of the Vitiligo Society have reported that they obtain information about vitiligo from non-medical sources, such as the Vitiligo Society (83%) and the internet (25%) rather than from dermatologists (13%) and General Practitioners (GPs) (7%).<sup>8</sup> Surprisingly few had obtained advice from GPs or dermatologists. Further research is needed to explore whether this relates to difficulties in accessing advice or whether people actively choose to obtain advice elsewhere.

1  
2  
3 Qualitative methods are well suited to exploring a topic in-depth from the perspective of a particular  
4 group of people. Qualitative research that seeks to explore people's experiences of obtaining  
5 information about vitiligo and their help seeking behaviour could help to determine whether people  
6 with vitiligo expect GPs or Dermatologists to advise them about vitiligo or whether they generally  
7 seek information from charities or the internet instead of, or in addition to, consulting. This in turn  
8 would enable better understanding of how GPs and Dermatologists can best support people with  
9 vitiligo in terms of information provision and/ or signposting to reliable resources. Given the  
10 potential insights into people's experiences to be gained by using qualitative methods<sup>12</sup>, we  
11 incorporated open-ended questions into a quantitative survey about information and help-seeking  
12 behaviour in people with vitiligo. We aimed to explore views and experiences of seeking  
13 information and help for vitiligo through analysis of the written accounts of survey respondents.  
14  
15  
16  
17  
18  
19  
20  
21  
22

## 23 **METHODS**

24  
25 This study sought to qualitatively analyse the free text comments within a quantitative survey that  
26 focused on exploring sources of information for vitiligo, experiences of treatment and information  
27 needs. This qualitative approach has been previously used in other health-related research.<sup>13-15</sup>  
28  
29

30 Ethical approval was granted by the Faculty of Medicine Research Ethics Committee, University of  
31 Southampton.  
32  
33

### 34 **Main survey**

35  
36 An anonymous online survey of people with vitiligo was conducted in the UK in February 2016  
37 (response rate 161/675 (24%)). We sought participants through the Vitiligo Society, partly because  
38 this had been a successful route for previous research<sup>8</sup> but also because informal advice suggested  
39 vitiligo might not be well coded in primary care so recruiting through this route would be  
40 problematic. Details about the study and a link to the online survey were emailed to 675 members  
41 of the Vitiligo Society. A reminder email was sent out after 2 weeks. The survey link was also made  
42 available on the Vitiligo Society website from February to March 2016. Participants provided online  
43 informed consent prior to accessing the survey. In total, 161 people completed some or all of the  
44 survey questions and were included in the analysis (Table 1). Quantitative survey findings regarding  
45 sources of information and help-seeking were similar to those previously reported.<sup>8</sup> This paper  
46 focusses on the rich qualitative data obtained from the free text responses to open-ended questions  
47 in the survey.  
48  
49  
50  
51  
52  
53  
54  
55  
56  
57  
58  
59  
60

**Table 1: Survey Respondents' Characteristics**

|                                    | <b>Number of participants<br/>N=161</b> | <b>Percentage<br/>(%)</b> |
|------------------------------------|-----------------------------------------|---------------------------|
| Answered for themselves            | 151                                     | 93.8                      |
| Answered on behalf of other person | 4                                       | 2.5                       |
| Missing                            | 6                                       | 3.7                       |
| <b>Gender :</b>                    |                                         |                           |
| Male                               | 55                                      | 34.1                      |
| Female                             | 98                                      | 60.9                      |
| Missing                            | 8                                       | 5.0                       |
| <b>Age :</b>                       |                                         |                           |
| 5-16 years                         | 2                                       | 1.2                       |
| 16-25 years                        | 8                                       | 5.0                       |
| 26-45 years                        | 27                                      | 16.8                      |
| 46-65 years                        | 73                                      | 45.3                      |
| More than 65 years                 | 45                                      | 28.0                      |
| Missing                            | 6                                       | 3.7                       |
| <b>Portion of skin affected :</b>  |                                         |                           |
| Just a few patches (0-10%)         | 35                                      | 21.7                      |
| A fair amount (10-25%)             | 41                                      | 25.5                      |
| Quite a lot (25-50%)               | 33                                      | 20.5                      |
| Very much (50-80%)                 | 25                                      | 15.5                      |
| All or nearly all (more than 80%)  | 19                                      | 11.8                      |
| Missing                            | 8                                       | 5.0                       |
| <b>Skin Colour :</b>               |                                         |                           |
| Fair                               | 67                                      | 41.6                      |
| Medium                             | 75                                      | 46.6                      |
| Dark                               | 10                                      | 6.2                       |
| Very dark                          | 1                                       | 0.6                       |
| Missing                            | 8                                       | 5.0                       |
| <b>Family with vitiligo :</b>      |                                         |                           |
| Yes                                | 72                                      | 44.7                      |
| No                                 | 82                                      | 50.9                      |
| Missing                            | 7                                       | 4.4                       |
| <b>Living :</b>                    |                                         |                           |
| UK                                 | 147                                     | 91.3                      |
| Europe                             | 1                                       | 0.6                       |
| Elsewhere                          | 5                                       | 3.1                       |
| Missing                            | 8                                       | 5.0                       |

**Qualitative component**

The online survey included four open-ended questions, which allowed participants to respond in more detail (Table 2). The survey dataset was imported into NVivo 10 and responses to the open-

ended questions collated for analysis. A total of 495 responses to the open-ended questions (20,728 words) were received from 158 of the 161 survey respondents (98% of respondents completed the free-text questions in addition the other survey questions). Responses to the open-ended questions ranged from brief comments (one phrase or sentence) to more detailed accounts (a couple of paragraphs). Question 3 (informational needs of people with vitiligo) received the most responses and question 2 (experiences of seeking treatment for vitiligo) received the most detailed comments.

**Table 2: Open-ended questions in survey**

| Questions                                                                                                                                                                                | No. of responses to each question | Total no. of words per question |
|------------------------------------------------------------------------------------------------------------------------------------------------------------------------------------------|-----------------------------------|---------------------------------|
|                                                                                                                                                                                          | %                                 |                                 |
| <b>Q1.</b> We would be very interested to learn more about your experience of getting information for vitiligo. <i>If you are happy to, please can you tell us some more about this?</i> | <b>142</b><br>(90%)               | 5,419                           |
| <b>Q2.</b> We would be very interested to learn more about your experience of getting treatment for vitiligo. <i>If you are happy to, please can you tell us some more about this?</i>   | <b>103</b><br>(65%)               | 6,634                           |
| <b>Q3.</b> Are there any aspects of vitiligo that you feel you would like to know more about?                                                                                            | <b>148</b><br>(94%)               | 3,682                           |
| <b>Q4.</b> Is there anything you would like to say that you feel has not been covered already?                                                                                           | <b>102</b><br>(65%)               | 4,993                           |

### Data analysis

An inductive thematic analysis was conducted to explore people's experiences of seeking information and help for vitiligo.<sup>16</sup> One author (ET) read the comments several times to achieve familiarisation with the data and codes were applied line by line. Codes were derived inductively from the data and grouped together to produce an initial coding frame. Codes were compared to identify similarities and differences. A detailed coding manual (containing code names, code descriptions and data excerpts) was created to ensure transparent and systematic coding of the data. Codes and theme/sub-theme definitions were discussed with recourse to the data, and iteratively developed by three members of the research team (ET, MS and IM) to offer diverse inferences and interpretation of the data. A negative case analysis was carried out to ensure that all data was taken into account rather than just selecting data that fitted with the authors' viewpoint.

1  
2  
3 Data saturation could not be determined due to the nature of the method of data collection. Using  
4 NVivo enabled a detailed audit trail to be maintained.  
5  
6  
7  
8  
9

## 10 11 **RESULTS**

12  
13 The majority of survey respondents (n=158, 98%) completed the open-ended questions, suggesting  
14 that those who responded to the survey were highly motivated to provide written feedback on their  
15 experiences of seeking help and information for vitiligo. Analysis of these data highlighted 3 themes:  
16  
17 1) *experiences of consulting health professionals for vitiligo*, 2) *seeking information about vitiligo*,  
18  
19 3) *perceptions and experiences of vitiligo treatments*. These themes are explored in detail below.  
20

21 All quotes are labelled with a participant ID, gender and age.  
22  
23  
24  
25

### 26 **Experiences of consulting health professionals for vitiligo**

27  
28 A sense of dissatisfaction and feeling unsupported was apparent in participants' reports about their  
29 experiences of consulting health professionals for vitiligo. Participants often seemed disappointed  
30 by the response they had received from GPs, who were viewed as their primary source of contact  
31 and advice. A common perception amongst participants was that GPs are not generally aware of, or  
32 particularly knowledgeable about, vitiligo and as such can only provide limited information and  
33  
34 advice to patients.  
35  
36

37  
38 *"None of the GP's I have spoken to have ever offered advice about Vitiligo. They seem to be somewhat in the*  
39 *dark about the problem."* (Pt36, male, over 65 years)  
40  
41

42  
43 Where health professionals appeared sympathetic or where signposting towards further information  
44 was offered this was appreciated, even where people felt their GP had not been knowledgeable.  
45

46  
47 *"I have had vitiligo for about 35 years. I am now 70 years old. I have found that, with very few exceptions, GPs*  
48 *know little about the condition. One of my GPs (who "half-retired" a few years ago) was always interested in*  
49 *learning more and asked me if I could provide some information on vitiligo. I gave her some printed material*  
50 *and she was grateful; I know that she read everything which I provided."* (Pt110, male, over 65 years)  
51  
52

53  
54 Many participants felt they had just been left to 'get on with it' and learn to accept and manage their  
55 vitiligo on their own. For some participants this led them to seeking out alternative treatments not  
56  
57

1  
2  
3 available in the UK. Another dominant perspective in this study was the sense that vitiligo is not  
4 taken seriously by medical professionals, both GPs and dermatologists. Many participants felt that  
5 their vitiligo was dismissed by health professionals as something inconsequential, i.e. purely  
6 cosmetic, which was upsetting to those experiencing substantial psychosocial impact.  
7  
8

9  
10 *"I started my first signs of Vitiligo 30 years ago at the age of 40. I went to my GP who referred me to a*  
11 *consultant. The consultant proved to be absolutely useless in providing any information. He just took one look*  
12 *at me, told me it was something called Vitiligo and told me that it would most likely get worse but wouldn't kill*  
13 *me!!!" (Pt71, female, over 65 years)*  
14

15 *"I noticed most doctors don't know much about vitiligo and really don't seem to care. I felt they had no clue*  
16 *about what a person with vitiligo goes through, Since it's not a matter of life or death, your expected to just*  
17 *accept it. I was very disappointed every time, always left feeling hopeless. I think they should have more to*  
18 *offer, be sympathetic & at least try different things" (Pt138, female, 46-65 years)*  
19  
20

### 21 22 23 **Seeking information about vitiligo**

24 Participants commonly reported seeking information from other sources, predominantly online  
25 resources, as a result of receiving limited information from health professionals. The Vitiligo Society  
26 was viewed as a helpful and trustworthy source of information for participants but many expressed  
27 doubts about the reliability and credibility of other online resources about vitiligo. A common  
28 concern expressed by the participants related to the credibility of online information on possible  
29 treatments for vitiligo. In particular, they expressed doubts about the commercial interests of the  
30 websites and about being able to determine the evidence base (safety and efficacy) of certain  
31 products and procedures.  
32  
33

34 *"I find it very difficult to find clear and consistent advice on possible treatments for Vitiligo. There are a lot of*  
35 *commercially orientated websites promoting a variety of herbal cures etc but limited proper evidence based*  
36 *medical guidance." (Pt40, male, 26-45 years)*  
37

38 *"The only problem when searching for vitiligo sites is that some websites eventually lead into selling some sort*  
39 *of product which is the new "best treatment". You find that because you are motivated to find some sort of*  
40 *treatment you end up almost believing the hype that they sell." (Pt139, male, 46-65 years)*  
41  
42

43  
44  
45  
46  
47  
48 A desire for detailed, reliable information about the causes of vitiligo, its progression and possible  
49 treatments was widely expressed. Some participants felt it important that such information should  
50 come directly from health professionals or other resources perceived to be trustworthy such as NHS  
51 Choices. Participants also expressed a desire for information and advice about managing the  
52 psychosocial impact of living with vitiligo, particularly advice on learning to cope with social  
53  
54  
55  
56  
57  
58  
59  
60



1  
2  
3 situations and people's reactions to their altered appearance, and how to explain the condition to  
4 others.

5  
6  
7 *"I developed vitiligo 42 years ago when I was 2. The GP referred me to a very good dermatologist who*  
8 *explained things clearly as well as, crucially, how to sensibly explain it to other children."* **(Pt11, female 26-45**  
9 **years)**

10  
11 *"I would like more information on the cause of it and how to deal with being so self-conscious about it - it does*  
12 *affect confidence and forming relationships."* **(Pt130, female, 26-45 years)**

### 13 14 15 16 **Perceptions and experiences of vitiligo treatments**

17  
18 Experiences of vitiligo treatments expressed by participants were very mixed. Whilst some  
19 participants expressed positive experiences of treatment, particularly UV light treatment, many  
20 participants appeared to have more negative experiences of seeking and receiving treatment for  
21 their vitiligo. A commonly expressed view was that vitiligo treatment is not routinely offered or is  
22 poorly available, especially on the NHS, and is limited to particular geographical locations.

23  
24  
25  
26 *"We decided to have light treatment. My main concern was the Vitiligo on my face. The treatment worked well*  
27 *but a few years later it appeared elsewhere on my face so I had more treatment that also worked well. The*  
28 *spread of vitiligo has slowed to almost a stop apart from a couple of new areas on my face."* **(Pt74, male, 46-65**  
29 **years)**

30  
31  
32 *"There is very little treatment for Vitiligo in the UK. I am at present involved with the Hi-Light trial run by the*  
33 *Univ of Nottingham. This is the first time I have been able to obtain any treatment."* **(Pt102, male, over 65**  
34 **years)**

35  
36  
37  
38 Many participants, who had received treatments such as steroid creams and light treatment for their  
39 vitiligo, felt they were ineffective in the long-term as the treatments had been unsuccessful in  
40 maintaining any areas of re-pigmentation. Participants also reported the perceived difficulties and  
41 potential side effects of vitiligo treatment such as concerns about skin thinning with steroid creams,  
42 time-consuming nature and inconvenience of hospital-based UV light treatment and the physical  
43 side effects of light treatment such as nausea and headaches.

44  
45  
46  
47  
48 *"I was referred to Dermatology and was prescribed PUVA treatment. This helped for a while, but became so*  
49 *time consuming. Progress was very slow. I stopped the treatment and any areas of repigmentation soon*  
50 *reverted back to white skin. So disappointing."* **(Pt156, female, 46-65 years)**

51  
52  
53  
54  
55 As well as mixed experiences of vitiligo treatments, there were mixed attitudes towards the need to  
56 seek vitiligo treatments in the first instance. Some participants reported less experience of

1  
2  
3 treatments because they had not sought these out and had 'accepted' their vitiligo, even though it  
4 may have had a profound impact on their lives.  
5

6  
7 *"I think that vitiligo is a relatively unknown condition. I have never been contacted about treatment or had it*  
8 *offered to me despite having had the condition for many years. You are very much left to get on with it. I can*  
9 *imagine that some people suffer psychologically and I wonder what support they get. I have come to terms*  
10 *with my patches and embrace them rather than disguise them but it can feel quite disheartening at times and I*  
11 *would rather not have them given the choice."* (Pt58, female, 46-65 years)  
12

## 13 14 15 **DISCUSSION**

16  
17 We found predominantly negative experiences of help-seeking, concerns about the credibility of  
18 online information, and the need for detailed, reliable vitiligo information. Frustration with  
19 challenges to help-seeking was often reported, particularly perceived lack of awareness of available  
20 treatments amongst GPs. Many felt that vitiligo was often dismissed by health professionals as  
21 'cosmetic', which was upsetting to those experiencing substantial psychosocial impact. Where GPs  
22 appeared sympathetic or where signposting towards further information was offered this was  
23 appreciated, even where people felt their GP had not seemed knowledgeable. There were very  
24 mixed views about the need for treatment and a desire for support with managing the psychosocial  
25 impact of vitiligo.  
26  
27  
28  
29  
30  
31  
32  
33

34 This study provides valuable insights into the experiences of people with vitiligo in seeking  
35 information and treatment about their condition. We employed an efficient yet relatively under-  
36 utilised method of qualitative data collection to explore an under-researched topic area. Given the  
37 relative anonymity of providing written responses in an online survey, these data may have been  
38 more candid than data collected in face-to-face research settings. However, it was not possible in  
39 this context to ask participants to expand on or clarify their free-text responses. Being able to clarify  
40 and explore further vitiligo patients' views and experiences in a qualitative interview may have  
41 generated richer data that would have enabled a more in-depth qualitative analysis.  
42  
43  
44  
45  
46

47 Our findings also need to be seen in the context of our sampling method. People with vitiligo who  
48 are members of the Vitiligo Society may not be representative of all people with vitiligo. Members  
49 of the Vitiligo Society pay an annual membership fee (£26), which may be a barrier to membership  
50 for some people. The response rate for our survey, which was carried out entirely online, was lower  
51 than the previous survey amongst Vitiligo Society members<sup>8</sup>, which was carried out by post. We did  
52 not compare responders to non-responders and so cannot be sure that our participants are different  
53  
54  
55  
56  
57

1  
2  
3 in some way to those who did not respond to the survey. This may mean that participants in this  
4 study had greater impact from vitiligo, were more unsatisfied with the information they had  
5 received, or were more engaged with seeking treatment and information, than other people with  
6 vitiligo and limits the transferability of the findings  
7  
8

9  
10 Most of the participants in this study were over 45, which is likely to be unrepresentative of the  
11 whole population of people with vitiligo as the condition commonly appears before the age of 20.<sup>17</sup>  
12  
13 <sup>18</sup> It is likely that most of the participants had had vitiligo for many years and their experience may  
14 differ from those more recently diagnosed. Furthermore, by sampling through a patient support  
15 group we may have been more likely to receive accounts from people whose needs had not been  
16 met by health services, although it is notable that this group still felt that they had many  
17 unanswered questions and that they found online information difficult to navigate.  
18  
19  
20  
21  
22  
23

24 The feeling that vitiligo is dismissed by health professionals as 'cosmetic' or 'trivial' shows that this is  
25 an ongoing concern for people, in common with previous reports,<sup>9 10</sup> and also in line with other skin  
26 conditions.<sup>19 20</sup> We found that people can find it difficult to judge the credibility of online information  
27 on vitiligo, as in other conditions<sup>21</sup>, but it seems surprising in this context where participants are all  
28 members of a relevant support group. We also found that participants still generally view health  
29 professionals as an important source of information, which has been noted in other studies<sup>22</sup> Again it  
30 seems surprising that our participants, who were members of a support group and many of whom  
31 reported negative experiences of consulting, still wanted health professionals to be the main source  
32 of information. Our finding that people are keen for support with managing the psychosocial impact  
33 of living with vitiligo was also found in a recent James Lind Alliance Priority Setting Partnership in the  
34 UK, which identified the need for further research into the effectiveness of psychological support for  
35 people with vitiligo, either on its own or together with other treatments.<sup>23</sup> The importance of  
36 providing people with skin diseases with access to a range of supportive services including  
37 psychological support was also acknowledged in a recent report of the All Party Parliamentary Group  
38 on Skin.<sup>24</sup>  
39  
40  
41  
42  
43  
44  
45  
46  
47  
48

49 Constraints on access to specialists through Primary Care 'gatekeeping' or 'managed care' may be  
50 associated with lower patient satisfaction<sup>25</sup> and respondents in this study expressed frustration  
51 with generalist services, perceiving them to have a low level of knowledge about their condition. It is  
52 not completely clear whether this represents lack of awareness amongst GPs of available treatments  
53 for vitiligo, or lack of provision of services into which they can refer. Access to vitiligo  
54  
55  
56  
57  
58  
59  
60

1  
2  
3 services/treatment is becoming increasingly difficult in many areas of the UK, which is likely to  
4 increase people's frustration with help-seeking and may exacerbate the psychosocial impact  
5 experienced by many people with vitiligo.  
6  
7  
8  
9

10 This paper highlights opportunities for further qualitative and quantitative research exploring and  
11 examining the needs of people with vitiligo, particularly younger people with vitiligo and those with  
12 a recent diagnosis. There is also a paucity of comparative evidence for effective treatments for  
13 vitiligo. In addition to quantitative research examining the effectiveness of treatments, greater  
14 evidence is also needed on how best to address the psychosocial impact of living with vitiligo. In this  
15 study people's support needs included advice on managing social situations and explaining the  
16 condition to others, learning how to use camouflage, as well as clear and up-to-date information  
17 about the pros and cons of available treatments. Further research to develop and test education and  
18 psychological support interventions that seek to address the information and support needs of  
19 people with vitiligo are likely to be valuable. In an era where people are increasingly obtaining health  
20 information online<sup>26</sup>, it may be that education and psychological support interventions delivered  
21 online may be beneficial.  
22  
23  
24  
25  
26  
27  
28  
29

30 In conclusion, more can be done to meet the information and help-seeking needs of people with  
31 vitiligo. People with vitiligo would welcome greater health professional awareness of the possibility  
32 of treating vitiligo, yet recognise that generalist services may not always be able to offer this. People  
33 who had been directed towards reliable information were very grateful for this and signposting is  
34 viewed as a key role of GPs, which remain the primary source of information for many. Fortunately  
35 good online resources for people with vitiligo are available (Box 1). Signposting people with vitiligo  
36 towards credible online resources and acknowledging and exploring the potential impact of the  
37 condition may allay people's perceptions that distress caused by the condition is not taken seriously.  
38  
39  
40  
41  
42  
43  
44  
45  
46  
47  
48  
49  
50  
51  
52  
53  
54  
55  
56  
57  
58  
59  
60

**Box 1: Online resources for people with vitiligo**

| Website                     | URL                                                                                                                                                                                                                                                                                                                                           |
|-----------------------------|-----------------------------------------------------------------------------------------------------------------------------------------------------------------------------------------------------------------------------------------------------------------------------------------------------------------------------------------------|
| <b>NHS Choices</b>          | <a href="http://www.nhs.uk/conditions/Vitiligo/Pages/Introduction.aspx">http://www.nhs.uk/conditions/Vitiligo/Pages/Introduction.aspx</a><br><br>Links to the official website of the National Health Service in England. Their section on vitiligo provides information and advice about vitiligo symptoms, causes diagnosis and treatments. |
| <b>Patient.co.uk</b>        | <a href="http://patient.info/health/vitiligo-leaflet">http://patient.info/health/vitiligo-leaflet</a><br><br>Links to a general medical information and support website providing information and advice about vitiligo symptoms, causes and treatments.                                                                                      |
| <b>The Vitiligo Society</b> | <a href="http://www.vitigosociety.org.uk/">http://www.vitigosociety.org.uk/</a><br><br>Links to The Vitiligo Society website, a UK-based charity providing information and support for people with vitiligo through their regularly update website and newsletter, <i>Dispatches</i> .                                                        |

**Funding Statement**

This research received no specific grant from any funding agency in the public, commercial or not-for-profit sectors.

**Competing interests**

The authors have no conflicts of interest to declare.

**Authors' contribution**

MS, IM and KT designed the study; AAS collected the data under supervision of MS and BS; ET, IM, BS and MS made substantial contributions to the analysis and interpretation of the data; ET drafted

1  
2  
3 the manuscript; IM, MS, BS, AAS and KT critically reviewed and revised the manuscript; all authors  
4 gave the final approval of the version to be published.  
5  
6  
7

8  
9 **Data sharing statement**

10  
11 This is a qualitative study and therefore the data generated is not suitable for sharing beyond that  
12 contained within the report. Further information can be obtained from the corresponding author.  
13  
14  
15  
16  
17  
18  
19  
20  
21  
22  
23  
24  
25  
26  
27  
28  
29  
30  
31  
32  
33  
34  
35  
36  
37  
38  
39  
40  
41  
42  
43  
44  
45  
46  
47  
48  
49  
50  
51  
52  
53  
54  
55  
56  
57  
58  
59  
60

For peer review only

1  
2  
3 **REFERENCES**

- 4  
5 1. Osinubi O, Grainge MJ, Hong L, et al. The prevalence of psychological co-morbidity in people with  
6 vitiligo: a systematic review and meta-analysis. *Br J Dermatol* 2017;doi: 10.1111/bjd.16049  
7
- 8 2. Zhang Y, Cai Y, Shi M, et al. The Prevalence of Vitiligo: A Meta-Analysis. *PLOS ONE*  
9 2016;11(9):e0163806.  
10
- 11 3. Porter JR, Beuf A, Lerner A, Nordlund J. Psychosocial effect of vitiligo: a comparison of vitiligo  
12 patients with "normal" control subjects, with psoriasis patients, and with patients with other  
13 pigmentary disorders. *J Am Acad Dermatol* 1986;15:220-4.  
14
- 15 4. Radtke MA, Schafer I, Gajur A, et al. Willingness-to-pay and quality of life in patients with vitiligo.  
16 *Br J Dermatol* 2009;161(1):134-9.  
17
- 18 5. Silverberg JI, Silverberg NB. Quality of life impairment in children and adolescents with vitiligo.  
19 *Pediatr Dermatol* 2014;31(3):309-18.  
20
- 21 6. Whitton ME, Pinart M, Batchelor J, Lushey C, Leonardi-Bee J, Gonzalez U. Interventions for vitiligo.  
22 *Cochrane Database Syst Rev* 2010;CD003263  
23
- 24 7. Taieb A, Alomar A, Bohm M, et al. Guidelines for the management of vitiligo: the European  
25 Dermatology Forum consensus. *Br J Dermatol* 2013;168:5-19.  
26
- 27 8. Talsania N, Lamb B, Bewley A. Vitiligo is more than skin deep: a survey of members of the Vitiligo  
28 Society. *Clin Exp Dermatol* 2010;35(7):736-9.  
29
- 30 9. Thompson AR, Kent G, Smith JA. Living with vitiligo: dealing with difference. *Br J Health Psychol*  
31 2002;7(Pt 2):213-25.  
32
- 33 10. Thompson AR, Clarke SA, Newell RJ, et al. Vitiligo linked to stigmatization in British South Asian  
34 women: a qualitative study of the experiences of living with vitiligo. *Br J Dermatol* 2010;163(3):481-  
35 6.  
36
- 37 11. Ezzedine K, Sheth V, Rodrigues M, et al. Vitiligo is not a cosmetic disease. *J Am Acad Dermatol*  
38 2015;73(5):883-5.  
39
- 40 12. Nelson PA. Getting under the skin: qualitative methods in dermatology research. *British Journal*  
41 *of Dermatology* 2015;172(4):841-43.  
42
- 43 13. Bishop FL, Howick J, Heneghan C, Stevens S, Richard Hobbs FDR, Lewith G. Placebo use in the UK:  
44 a qualitative study exploring GPs' views on placebo effects in clinical practice. *Family Practice*  
45 2014;31(3):357-63.  
46
- 47 14. Corner J, Wagland R, Glaser A, Richards, M. Qualitative analysis of patients' feedback from a  
48 PROMs survey of cancer patients in England. *BMJ Open* 2013;3:e002316.  
49  
50  
51  
52  
53  
54  
55  
56  
57  
58  
59  
60

- 1  
2  
3 15. Richards SH, Campbell J, Walshaw E, et al. A multi-method analysis of free-text comments from  
4 the UK General Medical Council Colleague Questionnaires. *Med Edu* 2009;43:757-66.  
5  
6 16. Joffe H Yardley L. Content and thematic analysis. In: (ed) MD, ed. *Research Methods for Clinical*  
7 *and Health Psychology*. London, UK: Sage, 2004:56-68.  
8  
9 17. Naik A. Vitiligo : Compilation of clinico-epidemiological features in patients attending tertiary  
10 care government hospital, Thane . *American Medical Journal* 2010;3(12):826-32.  
11  
12 18. Reghu R, James E. Epidemiological profile and treatment pattern of vitiligo in a tertiary care  
13 teaching hospital. *Int J Pharm Sci* 2011;3(2):137-41.  
14  
15 19. Magin PJ, Adams J, Heading GS, Pond CD. Patients with skin disease and their relationships with  
16 their doctors: a qualitative study of patients with acne, psoriasis and eczema . *Medical Journal of*  
17 *Australia* 2009;190(2):62-4.  
18  
19 20. Nelson PA, Graham- Chew C, Griffiths CE, Cordingley L, Team I. Recognition of need in health  
20 care consultations: a qualitative study of people with psoriasis. *Br J Dermatol* 2013;168(2):354-61.  
21  
22 21. Santer M, Muller I, Yardley L, Burgess H, Ersser SJ, Lewis-Jones S, et al. 'You don't know which  
23 bits to believe': qualitative study exploring carers' experiences of seeking information on the  
24 internet about childhood eczema. . *BMJ Open* 2015;5(4):e006339.  
25  
26 22. Sillence E, Briggs P, Harris PR, Fishwick L. . How do patients evaluate and make use of online  
27 health information? *Social science & medicine* 2007;64(9):1853-62.  
28  
29 23. Eleftheriadou V, Whitton ME, Gawkrödger DJ, et al. Future research into the treatment of  
30 vitiligo: where should our priorities lie? Results of the vitiligo priority setting partnership. *Br J*  
31 *Dermatol* 2011;164(3):530-36.  
32  
33 24. APPGS. *The Psychological and Social Impact of Skin Diseases on People's Lives. A Report of the All*  
34 *Party Parliamentary Group on Skin Updated 2013 Edition*. London, 2013.  
35  
36 25. Greenfield G, Foley K, Majeed A. Rethinking primary care's gatekeeper role. *BMJ* 2016;354(i4803)  
37  
38 26. Mazanderani F, Powell J. Using the internet as a source of information about patients'  
39 experiences. *Understanding and Using Health Experiences: Improving patient care* 2013:94-103  
40  
41  
42  
43  
44  
45  
46  
47  
48  
49  
50  
51  
52  
53  
54  
55  
56  
57  
58  
59  
60



## Consolidated criteria for reporting qualitative studies (COREQ): 32-item checklist

Developed from:

Tong A, Sainsbury P, Craig J. Consolidated criteria for reporting qualitative research (COREQ): a 32-item checklist for interviews and focus groups. *International Journal for Quality in Health Care*. 2007. Volume 19, Number 6: pp. 349 – 357

| No. Item                                       | Guide questions/description                                                                                                                              | Reported on Page # |
|------------------------------------------------|----------------------------------------------------------------------------------------------------------------------------------------------------------|--------------------|
| <b>Domain 1: Research team and reflexivity</b> |                                                                                                                                                          |                    |
| <i>Personal Characteristics</i>                |                                                                                                                                                          |                    |
| 1. Inter viewer/facilitator                    | Which author/s conducted the inter view or focus group?                                                                                                  | N/A                |
| 2. Credentials                                 | What were the researcher's credentials? E.g. PhD, MD                                                                                                     | N/A                |
| 3. Occupation                                  | What was their occupation at the time of the study?                                                                                                      | N/A                |
| 4. Gender                                      | Was the researcher male or female?                                                                                                                       | N/A                |
| 5. Experience and training                     | What experience or training did the researcher have?                                                                                                     | N/A                |
| <i>Relationship with participants</i>          |                                                                                                                                                          |                    |
| 6. Relationship established                    | Was a relationship established prior to study commencement?                                                                                              | N/A                |
| 7. Participant knowledge of the interviewer    | What did the participants know about the researcher? e.g. personal goals, reasons for doing the research                                                 | N/A                |
| 8. Interviewer characteristics                 | What characteristics were reported about the inter viewer/facilitator? e.g. Bias, assumptions, reasons and interests in the research topic               | N/A                |
| <b>Domain 2: study design</b>                  |                                                                                                                                                          |                    |
| <i>Theoretical framework</i>                   |                                                                                                                                                          |                    |
| 9. Methodological orientation and Theory       | What methodological orientation was stated to underpin the study? e.g. grounded theory, discourse analysis, ethnography, phenomenology, content analysis | Methods, pg. 5     |
| <i>Participant selection</i>                   |                                                                                                                                                          |                    |
| 10. Sampling                                   | How were participants selected? e.g. purposive, convenience, consecutive, snowball                                                                       | Methods, pg. 5     |
| 11. Method of approach                         | How were participants approached? e.g. face-to-face, telephone, mail, email                                                                              | Methods, pg. 5     |
| 12. Sample size                                | How many participants were in the study?                                                                                                                 | Page 7             |
| 13. Non-participation                          | How many people refused to participate or dropped out? Reasons?                                                                                          | Pages 2 & 5        |
| <i>Setting</i>                                 |                                                                                                                                                          |                    |
| 14. Setting of data collection                 | Where was the data collected? e.g. home, clinic, workplace                                                                                               | Methods, page 5    |
| 15. Presence of non-participants               | Was anyone else present besides the participants and researchers?                                                                                        | N/A                |

|                                        |                                                                                                                                 |            |
|----------------------------------------|---------------------------------------------------------------------------------------------------------------------------------|------------|
| 16. Description of sample              | What are the important characteristics of the sample? e.g. demographic data, date                                               | Page 6     |
| <i>Data collection</i>                 |                                                                                                                                 |            |
| 17. Interview guide                    | Were questions, prompts, guides provided by the authors? Was it pilot tested?                                                   | N/A        |
| 18. Repeat interviews                  | Were repeat inter views carried out? If yes, how many?                                                                          | N/A        |
| 19. Audio/visual recording             | Did the research use audio or visual recording to collect the data?                                                             | N/A        |
| 20. Field notes                        | Were field notes made during and/or after the inter view or focus group?                                                        | N/A        |
| 21. Duration                           | What was the duration of the inter views or focus group?                                                                        | N/A        |
| 22. Data saturation                    | Was data saturation discussed?                                                                                                  | N/A        |
| 23. Transcripts returned               | Were transcripts returned to participants for comment and/or correction?                                                        | N/A        |
| <b>Domain 3: analysis and findings</b> |                                                                                                                                 |            |
| <i>Data analysis</i>                   |                                                                                                                                 |            |
| 24. Number of data coders              | How many data coders coded the data?                                                                                            | Page 7     |
| 25. Description of the coding tree     | Did authors provide a description of the coding tree?                                                                           | Page 7     |
| 26. Derivation of themes               | Were themes identified in advance or derived from the data?                                                                     | Page 7&8   |
| 27. Software                           | What software, if applicable, was used to manage the data?                                                                      | Page 8     |
| 28. Participant checking               | Did participants provide feedback on the findings?                                                                              | N/A        |
| <i>Reporting</i>                       |                                                                                                                                 |            |
| 29. Quotations presented               | Were participant quotations presented to illustrate the themes/findings? Was each quotation identified? e.g. participant number | Pages 8-11 |
| 30. Data and findings consistent       | Was there consistency between the data presented and the findings?                                                              | Pages 8-11 |
| 31. Clarity of major themes            | Were major themes clearly presented in the findings?                                                                            | Pages 8-11 |
| 32. Clarity of minor themes            | Is there a description of diverse cases or discussion of minor themes?                                                          | Page 10    |
